# Supplementary material for: Beyond morphotropic phase boundaries: Atomic-scale mechanism unlocks thermal-stable high-κ performance in HfO2 via coherent interfaces
Source: Research Square preprint supplement (doi:10.21203/rs.3.rs-7347248/v1), 2025-10-01
Supplement: Supplementary file 1 [file 2dbaac35ba005a087dc033c2.docx]

**Supplementary Information for**

**Beyond morphotropic phase boundaries: Atomic-scale mechanism unlocks thermal-stable high*-κ* performance in HfO2 via coherent interfaces**

Yihao Shen1,a, Hongzheng Wang2,a, Xiaochun Ma2,Yuxiao Liu1, Fei Liang1, Shuxian Wang1,*, Pengfei Nan2,*, Binghui Ge2, Shujun Zhang3,*, Haohai Yu1,* & Huaijin Zhang1,*

1State Key Laboratory of Crystal Materials and Institute of Crystal Materials, Shandong University, Jinan, China.

2Information Materials and Intelligent Sensing Laboratory of Anhui Province, Leibniz International Joint Research Center of Materials Sciences of Anhui Province, Institutes of Physical Science and Information Technology, Anhui University, Hefei, China.

3Department of Chemistry, City University of Hong Kong, Kowloon, 999077, Hong Kong, China.

aThese authors contributed equally: Yihao Shen, Hongzheng Wang.

*Corresponding authors

Email: shuxianwang@sdu.edu.cn (S. W.)

npf@ahu.edu.cn (P. N.)

[s.j.zhang@cityu.edu.hk](mailto:s.j.zhang@cityu.edu.hk) (S. Z.)

haohaiyu@sdu.edu.cn (H. Y.)

huaijinzhang@sdu.edu.cn (H. Z.)

**Experimental section**

The polycrystalline Lu:Hf0.6Zr0.4O2 (Lu:HZO) powder was synthesized via high-temperature solid-state sintering. High-purity precursors including Lu₂O₃ (99.99%), HfO₂ (99.99%), and ZrO₂ (99.99%) were stoichiometrically weighed with fixed Zr:Hf molar ratio (4:6) and varying Lu doping concentrations (9.25 at.%, 9.75 at.%, and 10 at.%). The precursor mixture underwent ethanol-assisted homogenization followed by drying and mechanical grinding. Calcination was performed in a muffle furnace at 1100°C for 5 h under ambient atmosphere. The resultant powder was re-ground and subsequently consolidated into feed/seed rods through uniaxial pressing (60 MPa, 10 min). Stoichiometrically mixed Lu:HZO rods were directly sintered at 1400°C for 5 h in air for bulk crystal preparation.

Single crystal growth was achieved using an optical floating zone (OFZ) furnace (Crystal Systems Inc., FZ-T-123000-X-I-S-SU) equipped with four ellipsoidal mirrors capable of reaching 3000°C. Optimized growth parameters included counter-rotation of feed (5 rpm) and seed rods (10 rpm) under oxygen flow (150 mL/min). The OFZ process leveraged surface tension effects in the molten zone for crystal growth. When the growth of crystals was finished, we directly pulled the crystals down to room temperature from the high-temperature center within a very short time (typically within 2 s).

The as-grown crystals were subjected to comprehensive structural and functional characterization without post-processing. Phase identification was conducted using a Horiba iHR550 Raman spectrometer equipped with a 633 nm He-Ne excitation laser (5 mW output power), with spatial mapping performed at 2 mm intervals across selected crystal regions (Fig. 1c, Supplementary Fig. 1). High-resolution X-ray powder diffraction (XRPD) analysis was performed on a Rigaku SmartLab diffractometer with Cu Kα radiation (λ = 1.5406 Å), employing two scanning protocols: phase identification scans (10°-90° 2*θ* range, 3°/min step rate) and structural refinement scans (10°-120° 2*θ* range, 1°/min step rate). Rietveld refinement of crystal structures was implemented using TOPAS software. Chemical composition analysis was performed via electron probe microanalysis (EPMA, Shimadzu EPMA-1720H) with a 200 μm step resolution across designated crystal zones (Fig. 2c).

For the dielectric properties, the *m*-HfO2 (Pure HfO2)and *m*-HZO (Hf0.6Zr0.4O2) ceramics were sintered using the method mentioned above. The *o*-AFE phase(Lu:HfO2 (10 at. %)) and the *c*-HfO2 (Lu:HfO2 (16 at. %)) samples were grown by the OFZ method without the rapid quenching. The *t*/*o*-FE (Lu:Hf0.6Zr0.4O2 (10 at. %)) sample was prepared by annealing for the *t*-phase part of the *Crystal* 21. The *c*-ZrO2 sample is from the commercially available YSZ crystal. Dielectric spectroscopy was acquired using a Wayne Kerr 6500B precision impedance analyzer. The temperature-dependent dielectric constant *ε*r was surveyed with a heating rate of 5 °C min−1.

The crystal orientation identification and scanning transmission electron microscopy (STEM) sample preparation of Lu:HZO samples were carried out using the Crossbeam 550L dual-beam system from Carl Zeiss, which integrates both electron beam and focused ion beam (FIB) systems, and is equipped with an Oxford Instruments electron backscatter detector. The sample preparation process involved electron beam imaging and Ga ion milling to obtain thin film samples suitable for STEM analysis. Advanced microstructural characterization was performed using a double probe-corrected ThermoFisher Scientific Themis Z microscope operating at 300 kV. The four-segment DF4 detector was employed to acquire 2048 × 2048 pixel images of integrated differential phase contrast scanning transmission electron microscopy (iDPC-STEM) images, with a pixel dwell time of 2 μs. The convergence semi-angle and collection semi-angle were 25 mrad and 6-24 mrad, respectively. All of the iDPC-STEM images are Fourier-filtered in Gatan Microscopy Suite (GMS, v3.22.1461.0) to reduce the contrast noise, which does not affect the results of our measurements. The multiple-ellipse fitting (MEF) algorithm in CalAtom Software was used to accurately determine the Hf/Zr cation positions.


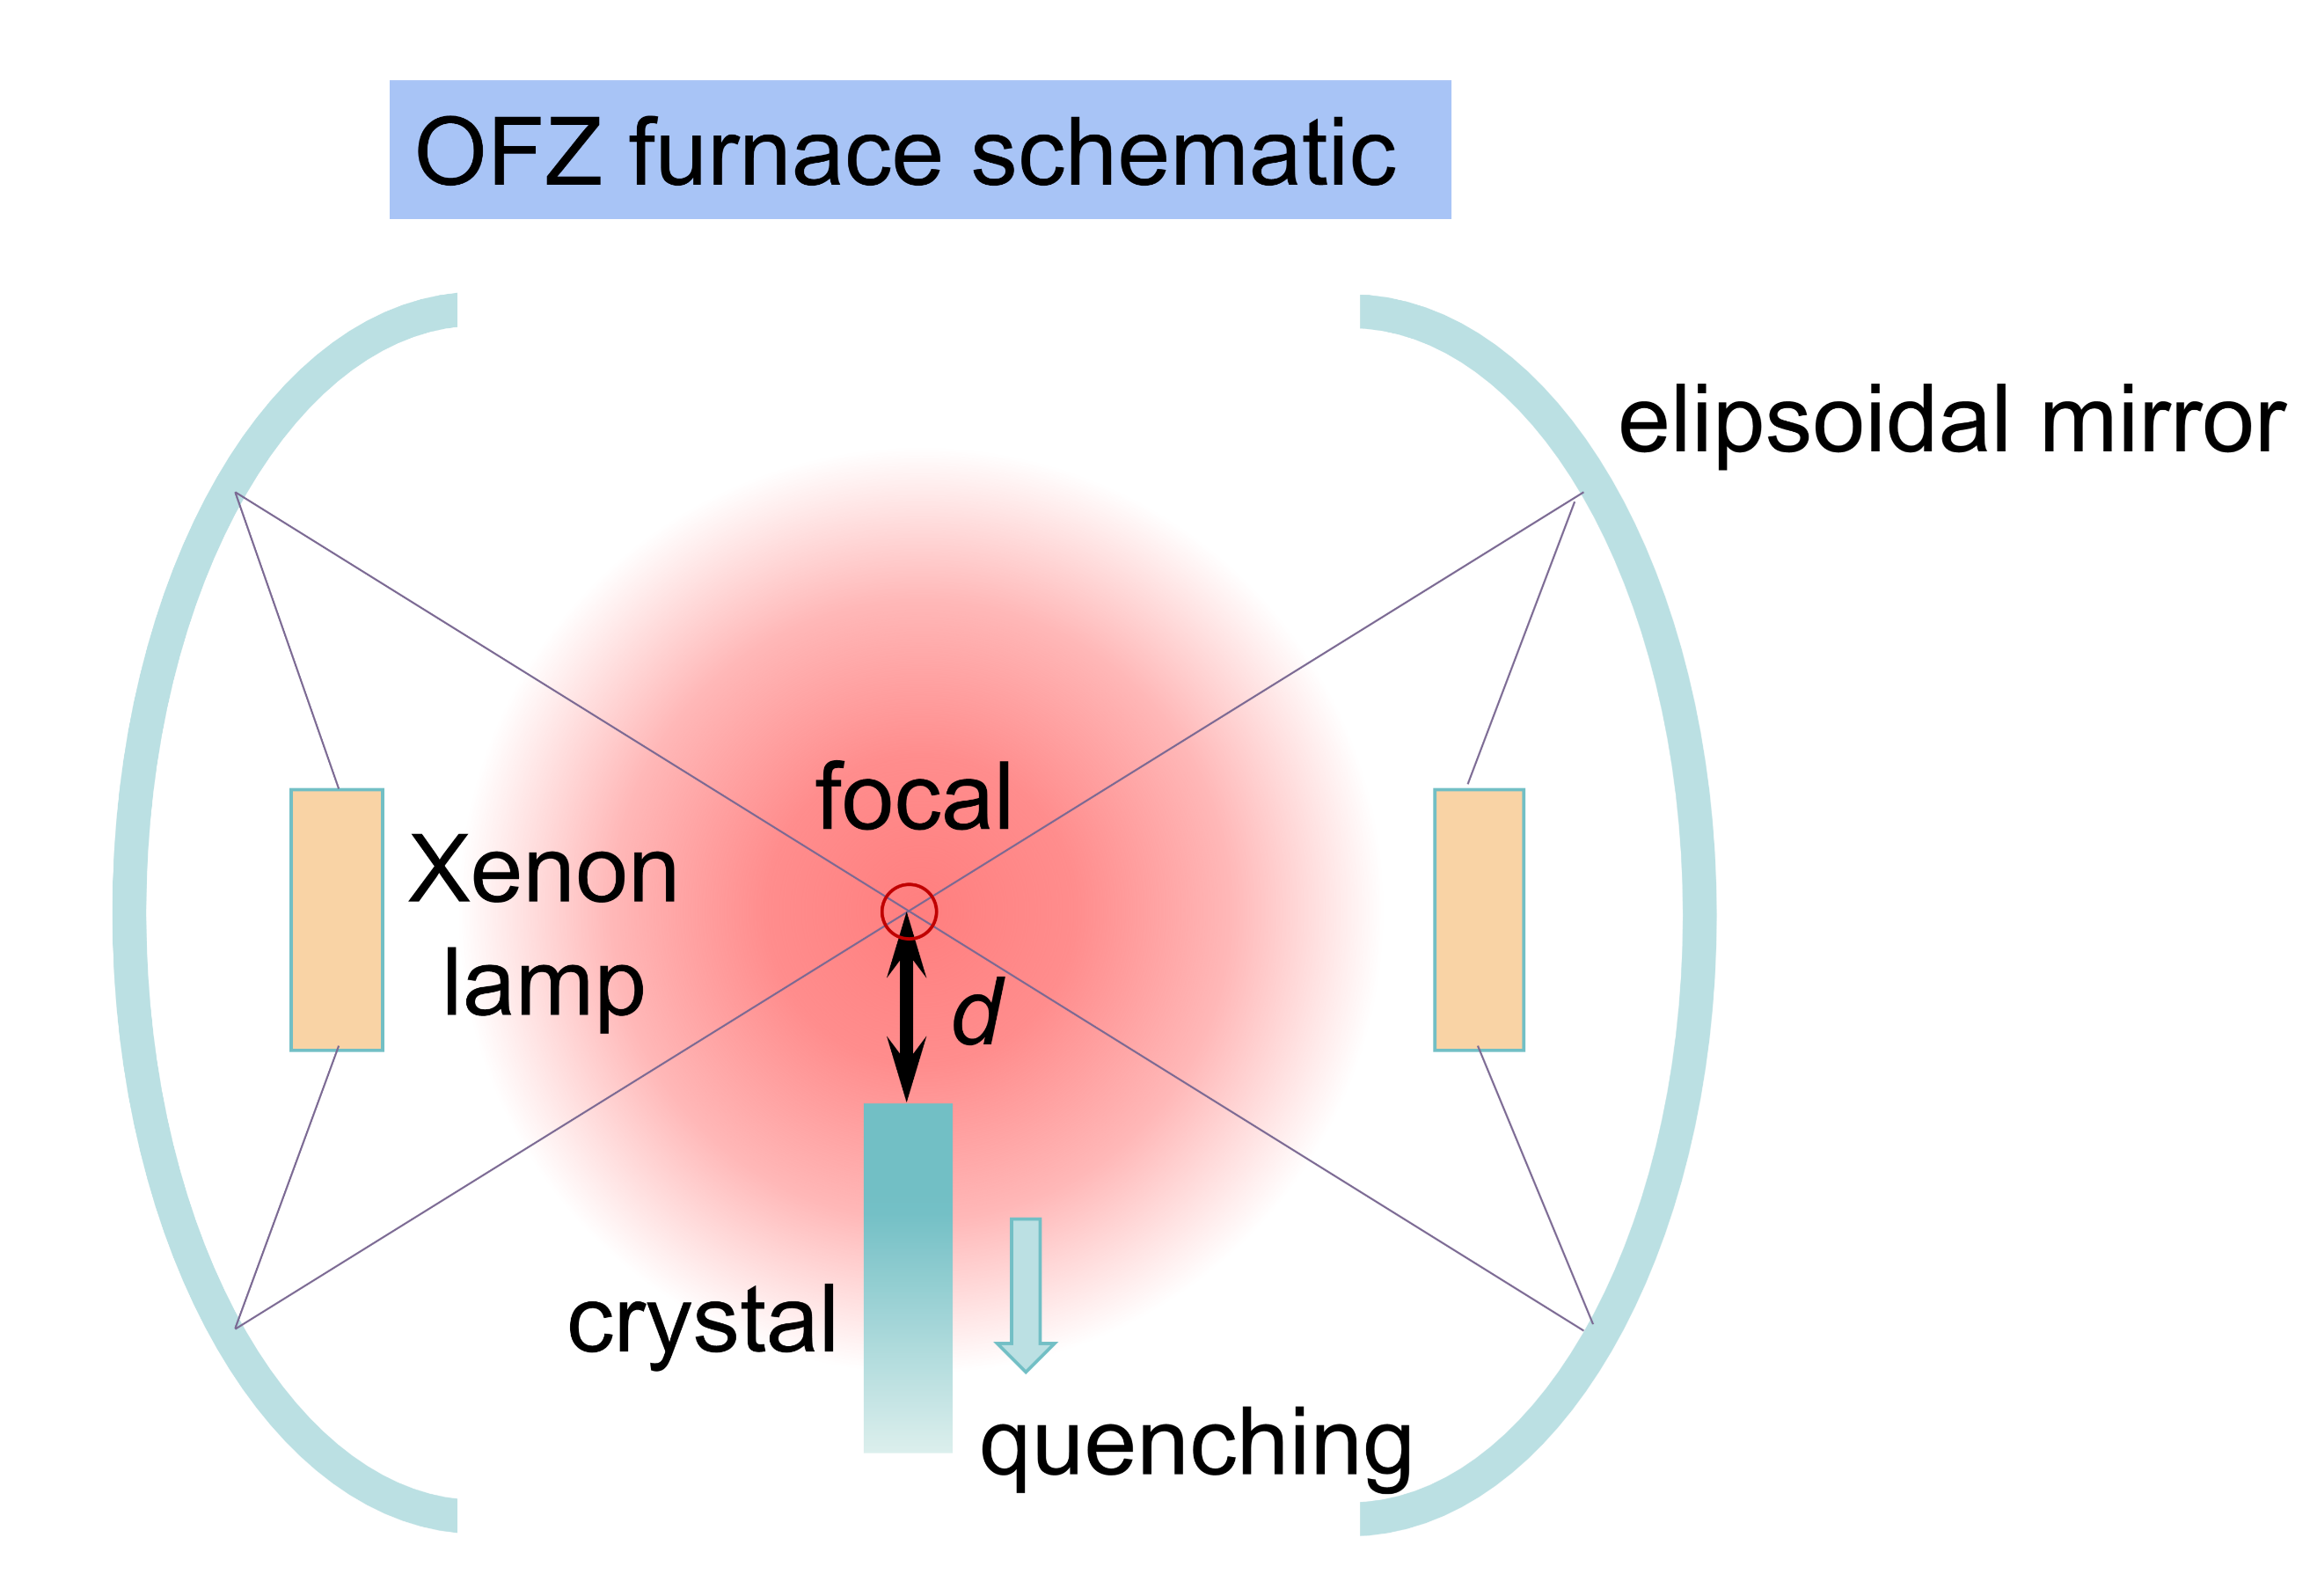


**Supplementary Fig. 1.** **OFZ furnace schematic.** *d* represents the distance from the focal point of the as-grown crystal to the focal point of the Xenon lamps.


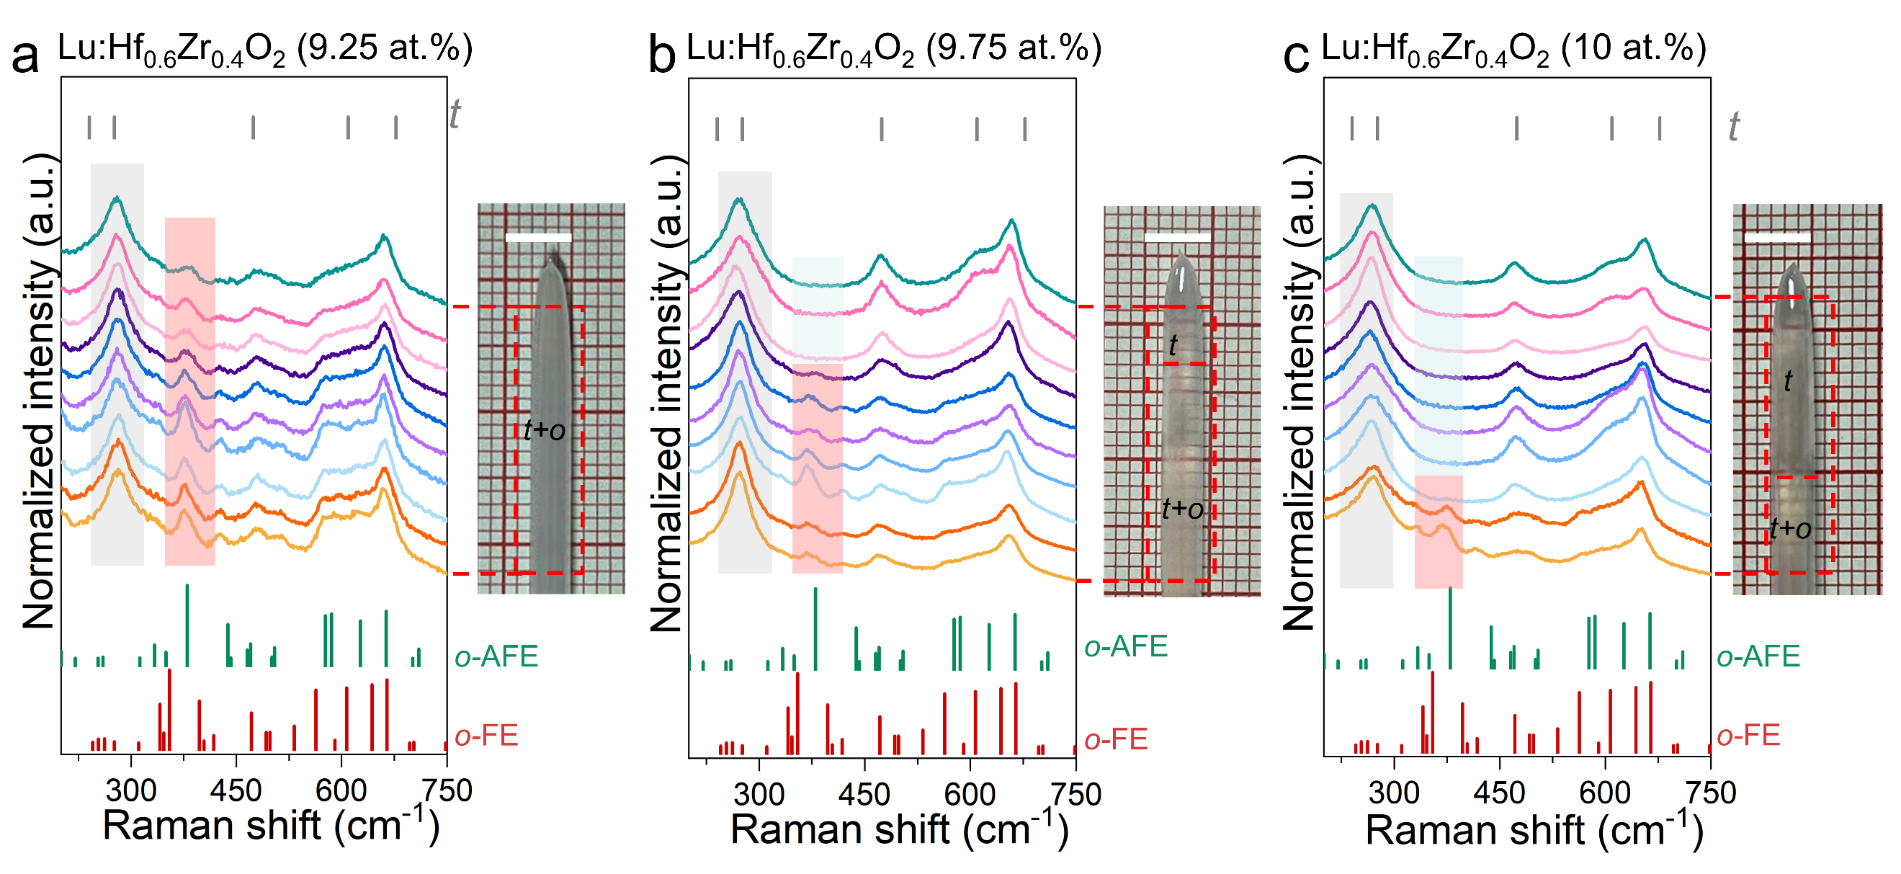


**Supplementary Fig. 2.** **Position-dependent Raman spectra of as-grown Lu:HZO bulk crystals with different Lu*-*doped concentrations.** **a**, For 9.25 at.%. **b**, For 9.75 at.% **c**, For 10 at.%. The theoretical Raman vibrational modes of *o*-AFE, *o*-FE,and *t* phases are from Refs2. Scale bar: 5 mm. The Zr:Hf ratio was fixed at 4:6.


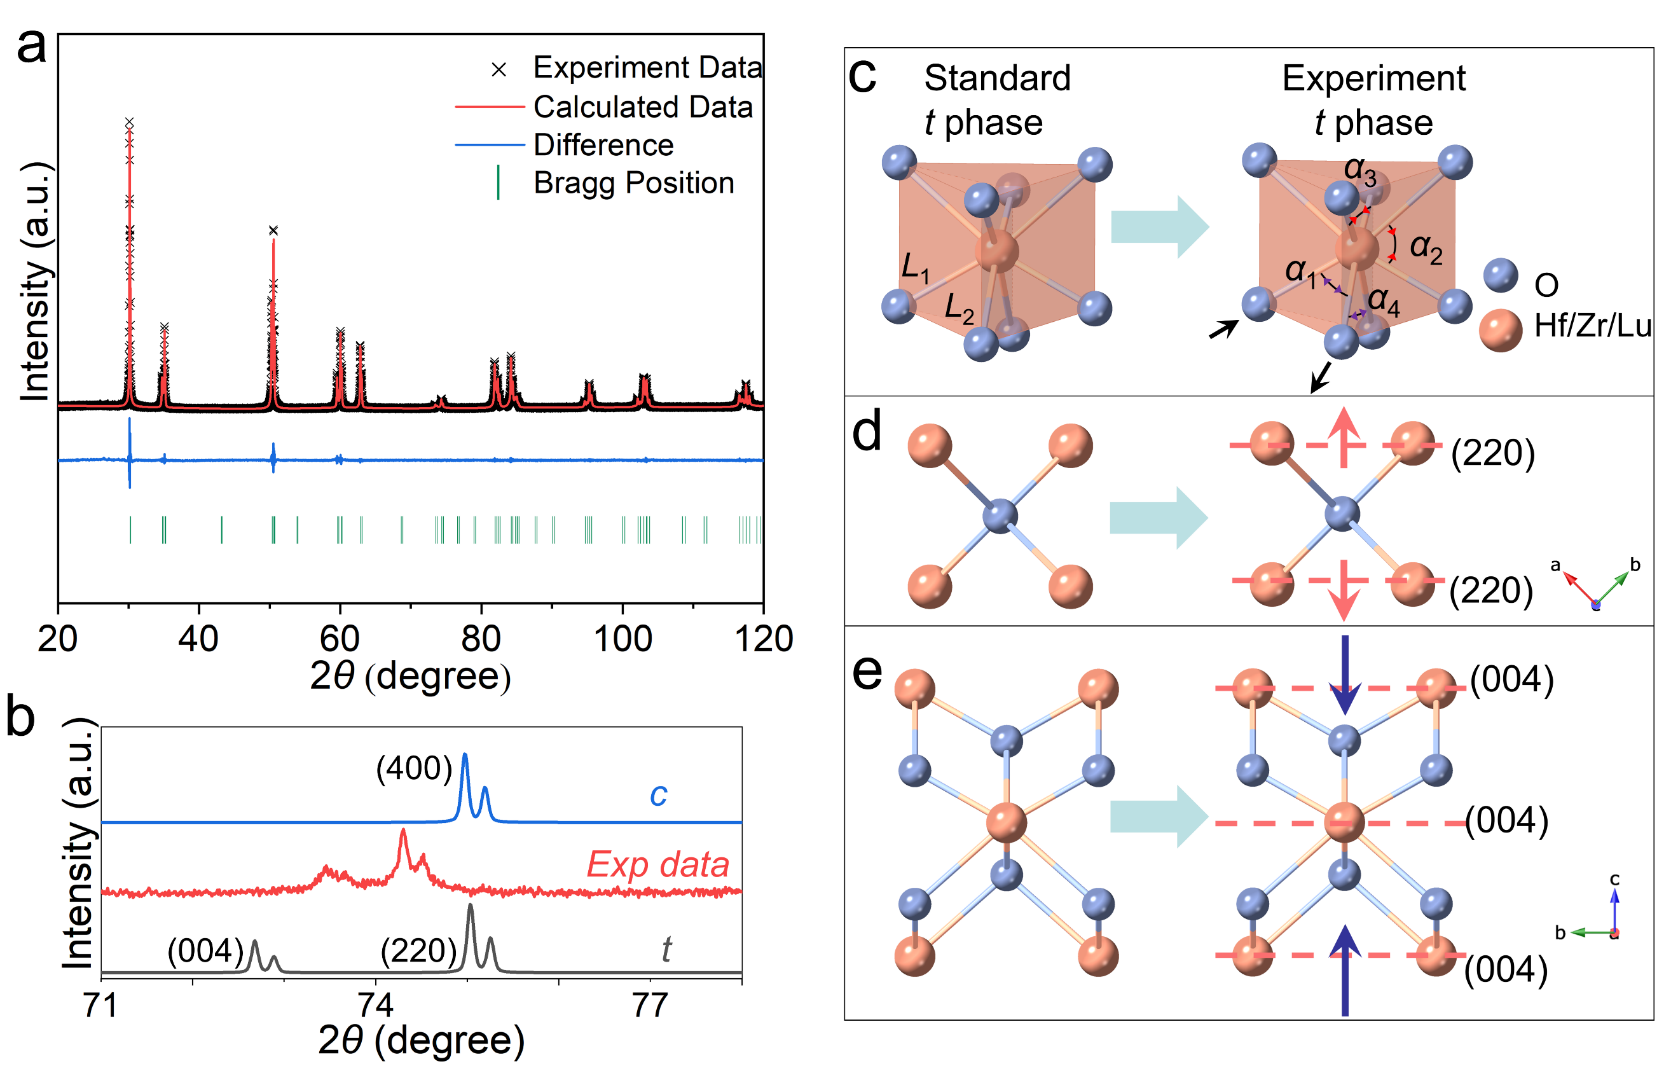


**Supplementary Fig. 3.** **Structural refinement of the as-obtained *t*-phase part within *Crystal* 2. a**, Refined result with *Rwp* = 5.91%. The standard cards of the *t* phase correspond to ICSD No. 173966. **b**, XRPD data in the 2*θ* range of 71o-80o. **c**, MO8 comparison between the experimental and standard *t*-phase structures. M represents Hf/Zr/Lu cations. For the Hf-O-Hf bond angles, *α*1 and *α*4 are large in the as-obtained *t* phase, while *α*2 and *α*3 are large in the standard *t* phase. **d**, **e**, Schematic elucidation of the variation of (220) and (004) planes of the as-obtained *t*-phase structure in comparison to the standard *t*-phase structure.


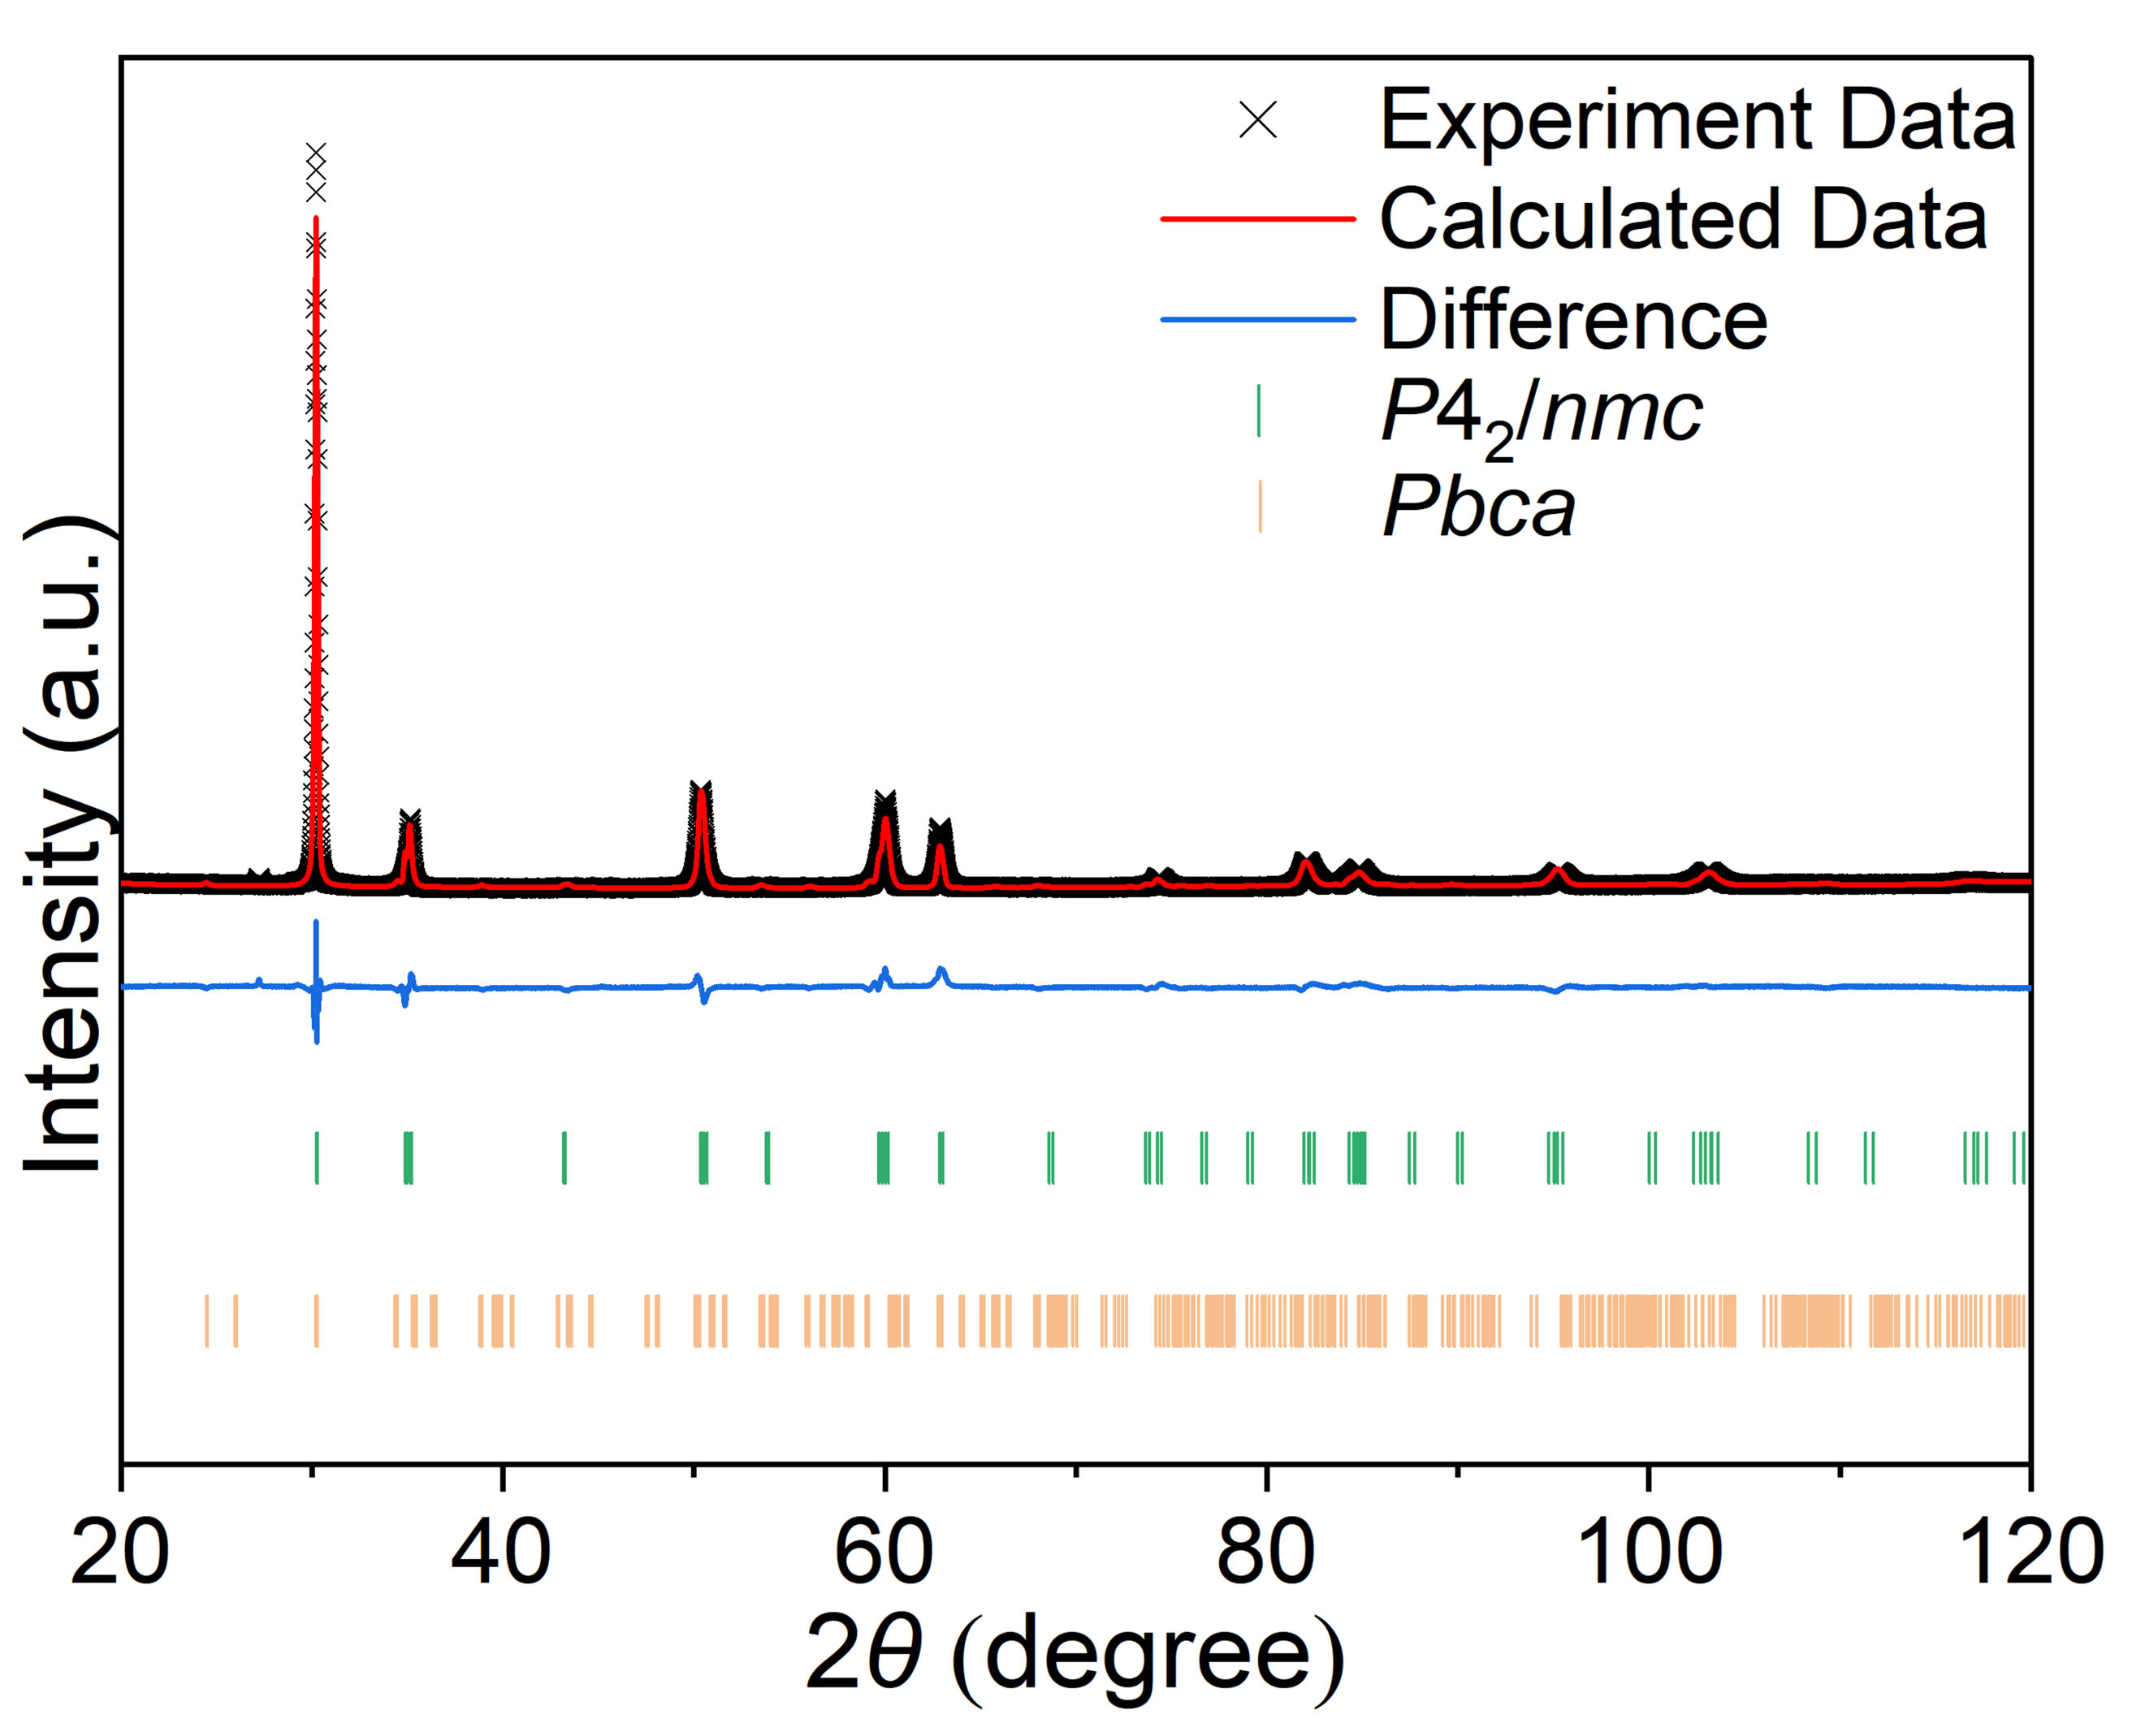


**Supplementary Fig. 4.** **Refined data of the *So+t* part within *Crystal* 2, with *Rwp* = 7.36%.** The standard cards of *t* and *o*-AFE phases correspond to ICSD Nos. 173966, and 79913, respectively. The phase components of the *t* and *o*-AFE phases were determined to 68.03% and 31.97%, respectively.


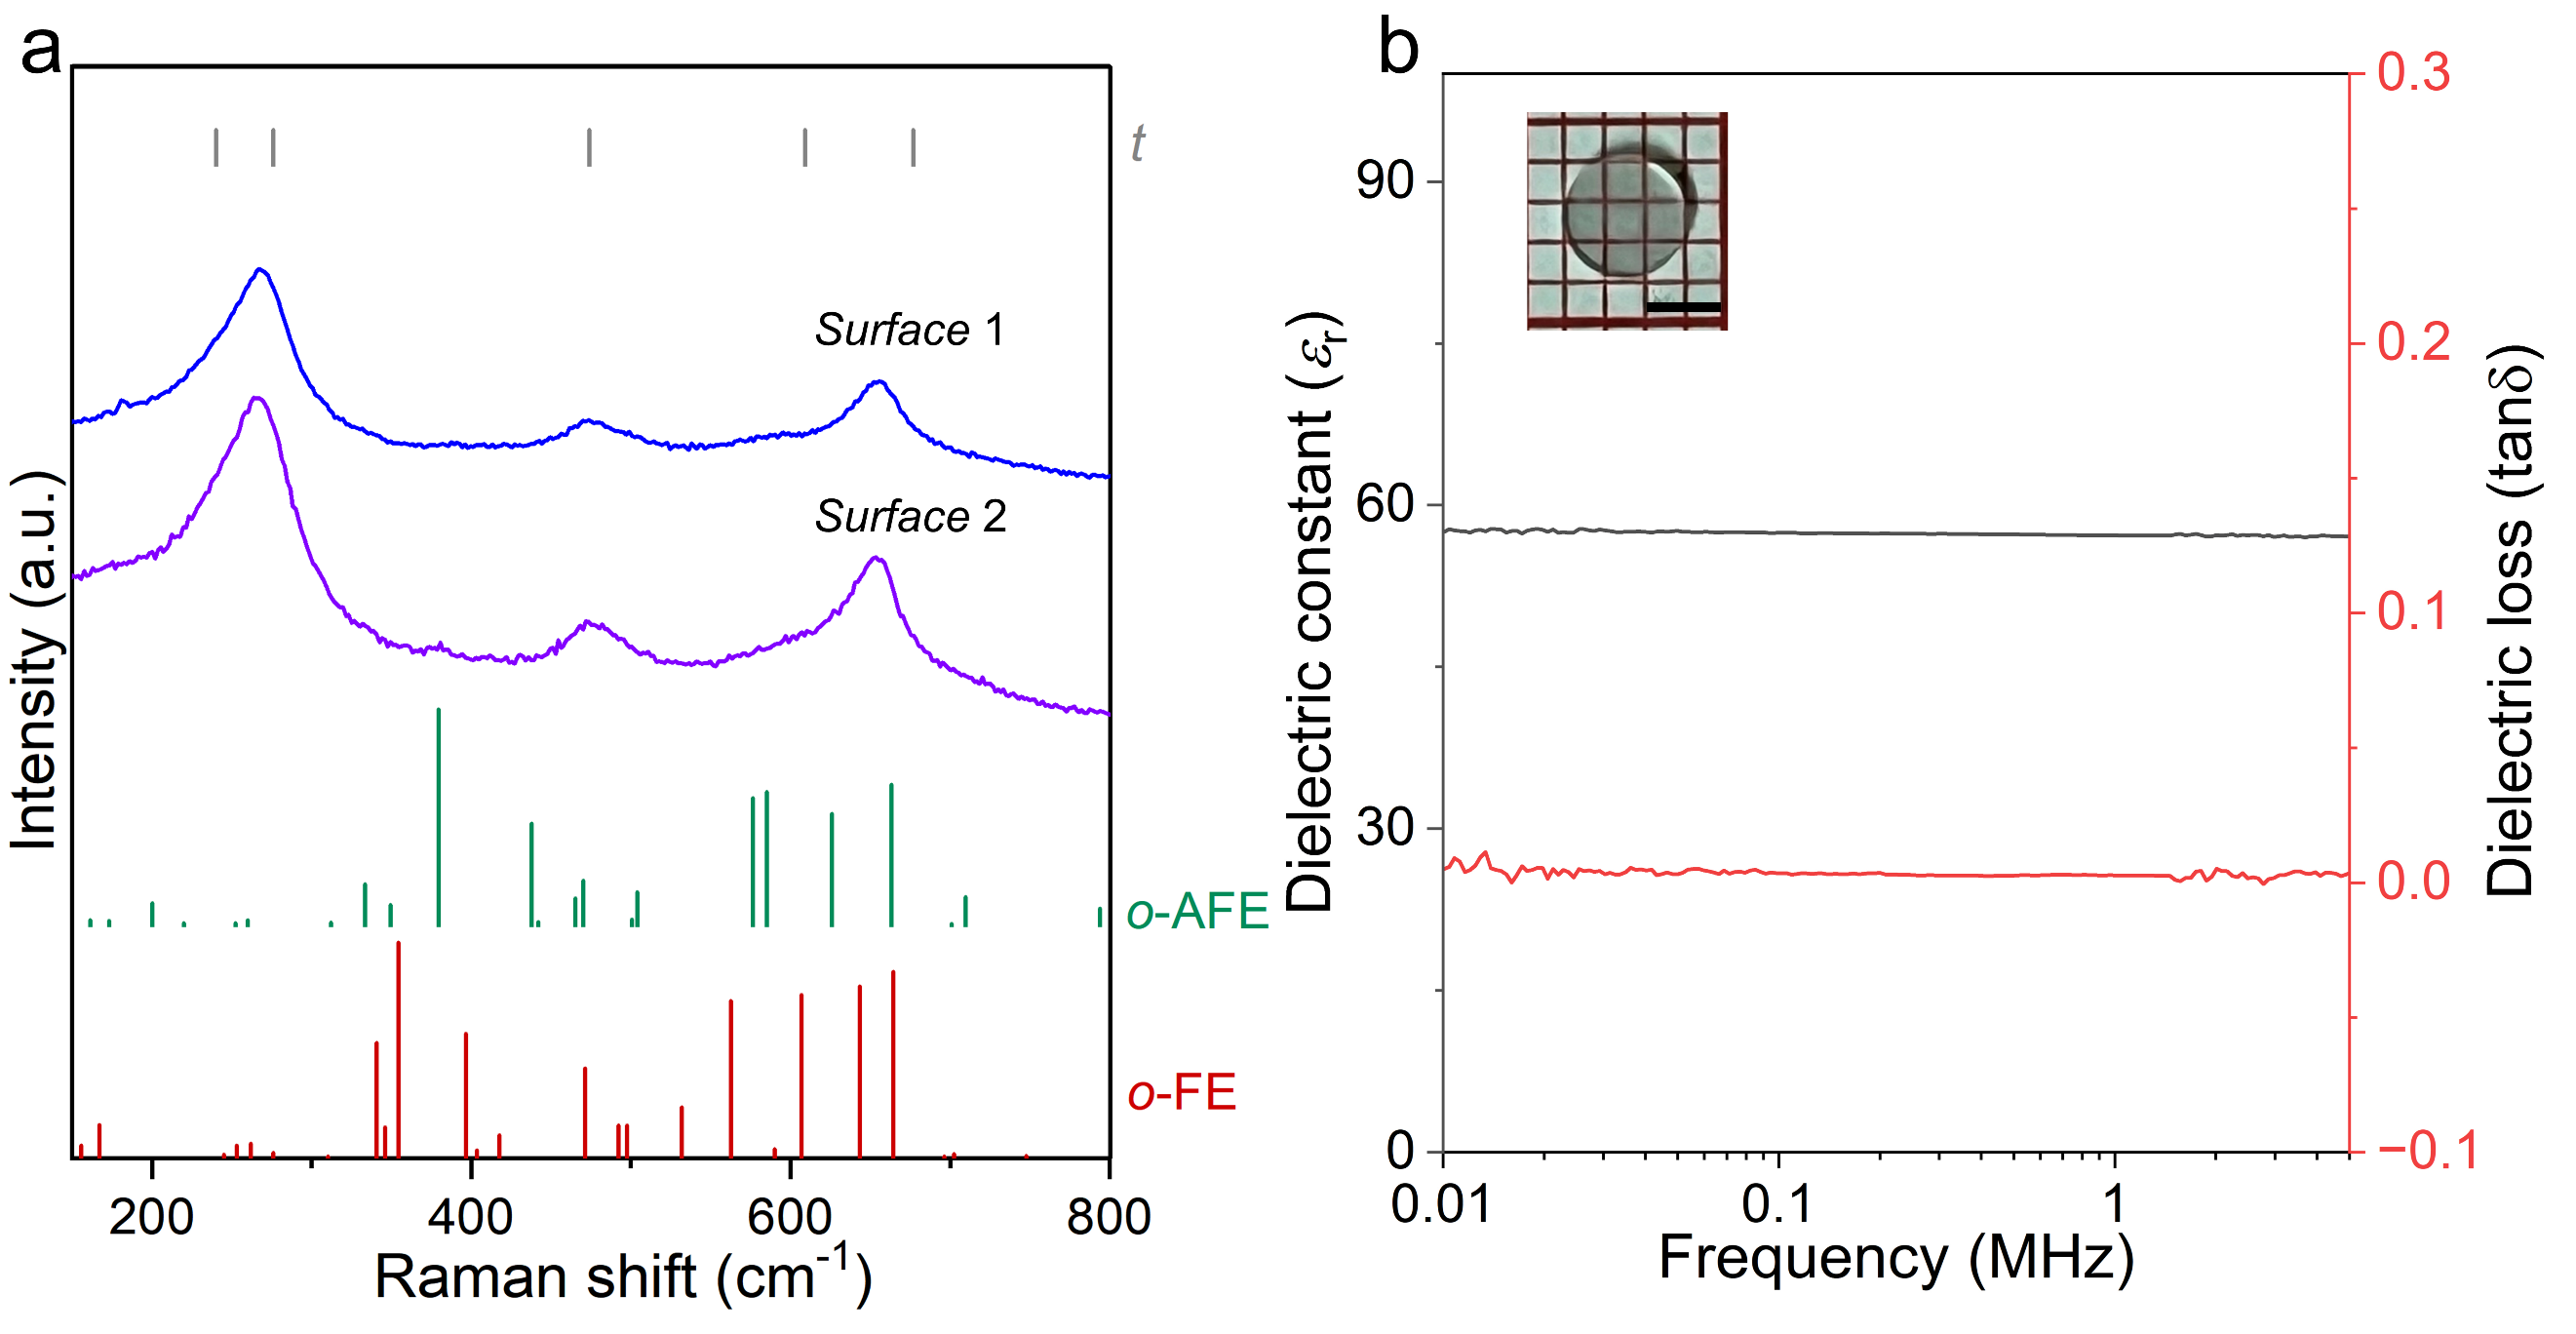


**Supplementary Fig. 5.** **Room-temperature Raman data and the frequency-dependent dielectric property of the *t*/*t*+*o*-AFE sample within *Crystal* 2. a**,Raman spectra of the two surfaces, connected to the *t* (*Surface* 1) and *t*+*o*-AFE (*Surface* 2) phase regions. **b**,Frequency-dependent dielectric constant and dielectric loss of this sample. The inset is the image of the sample. Scale bar: 2 mm.


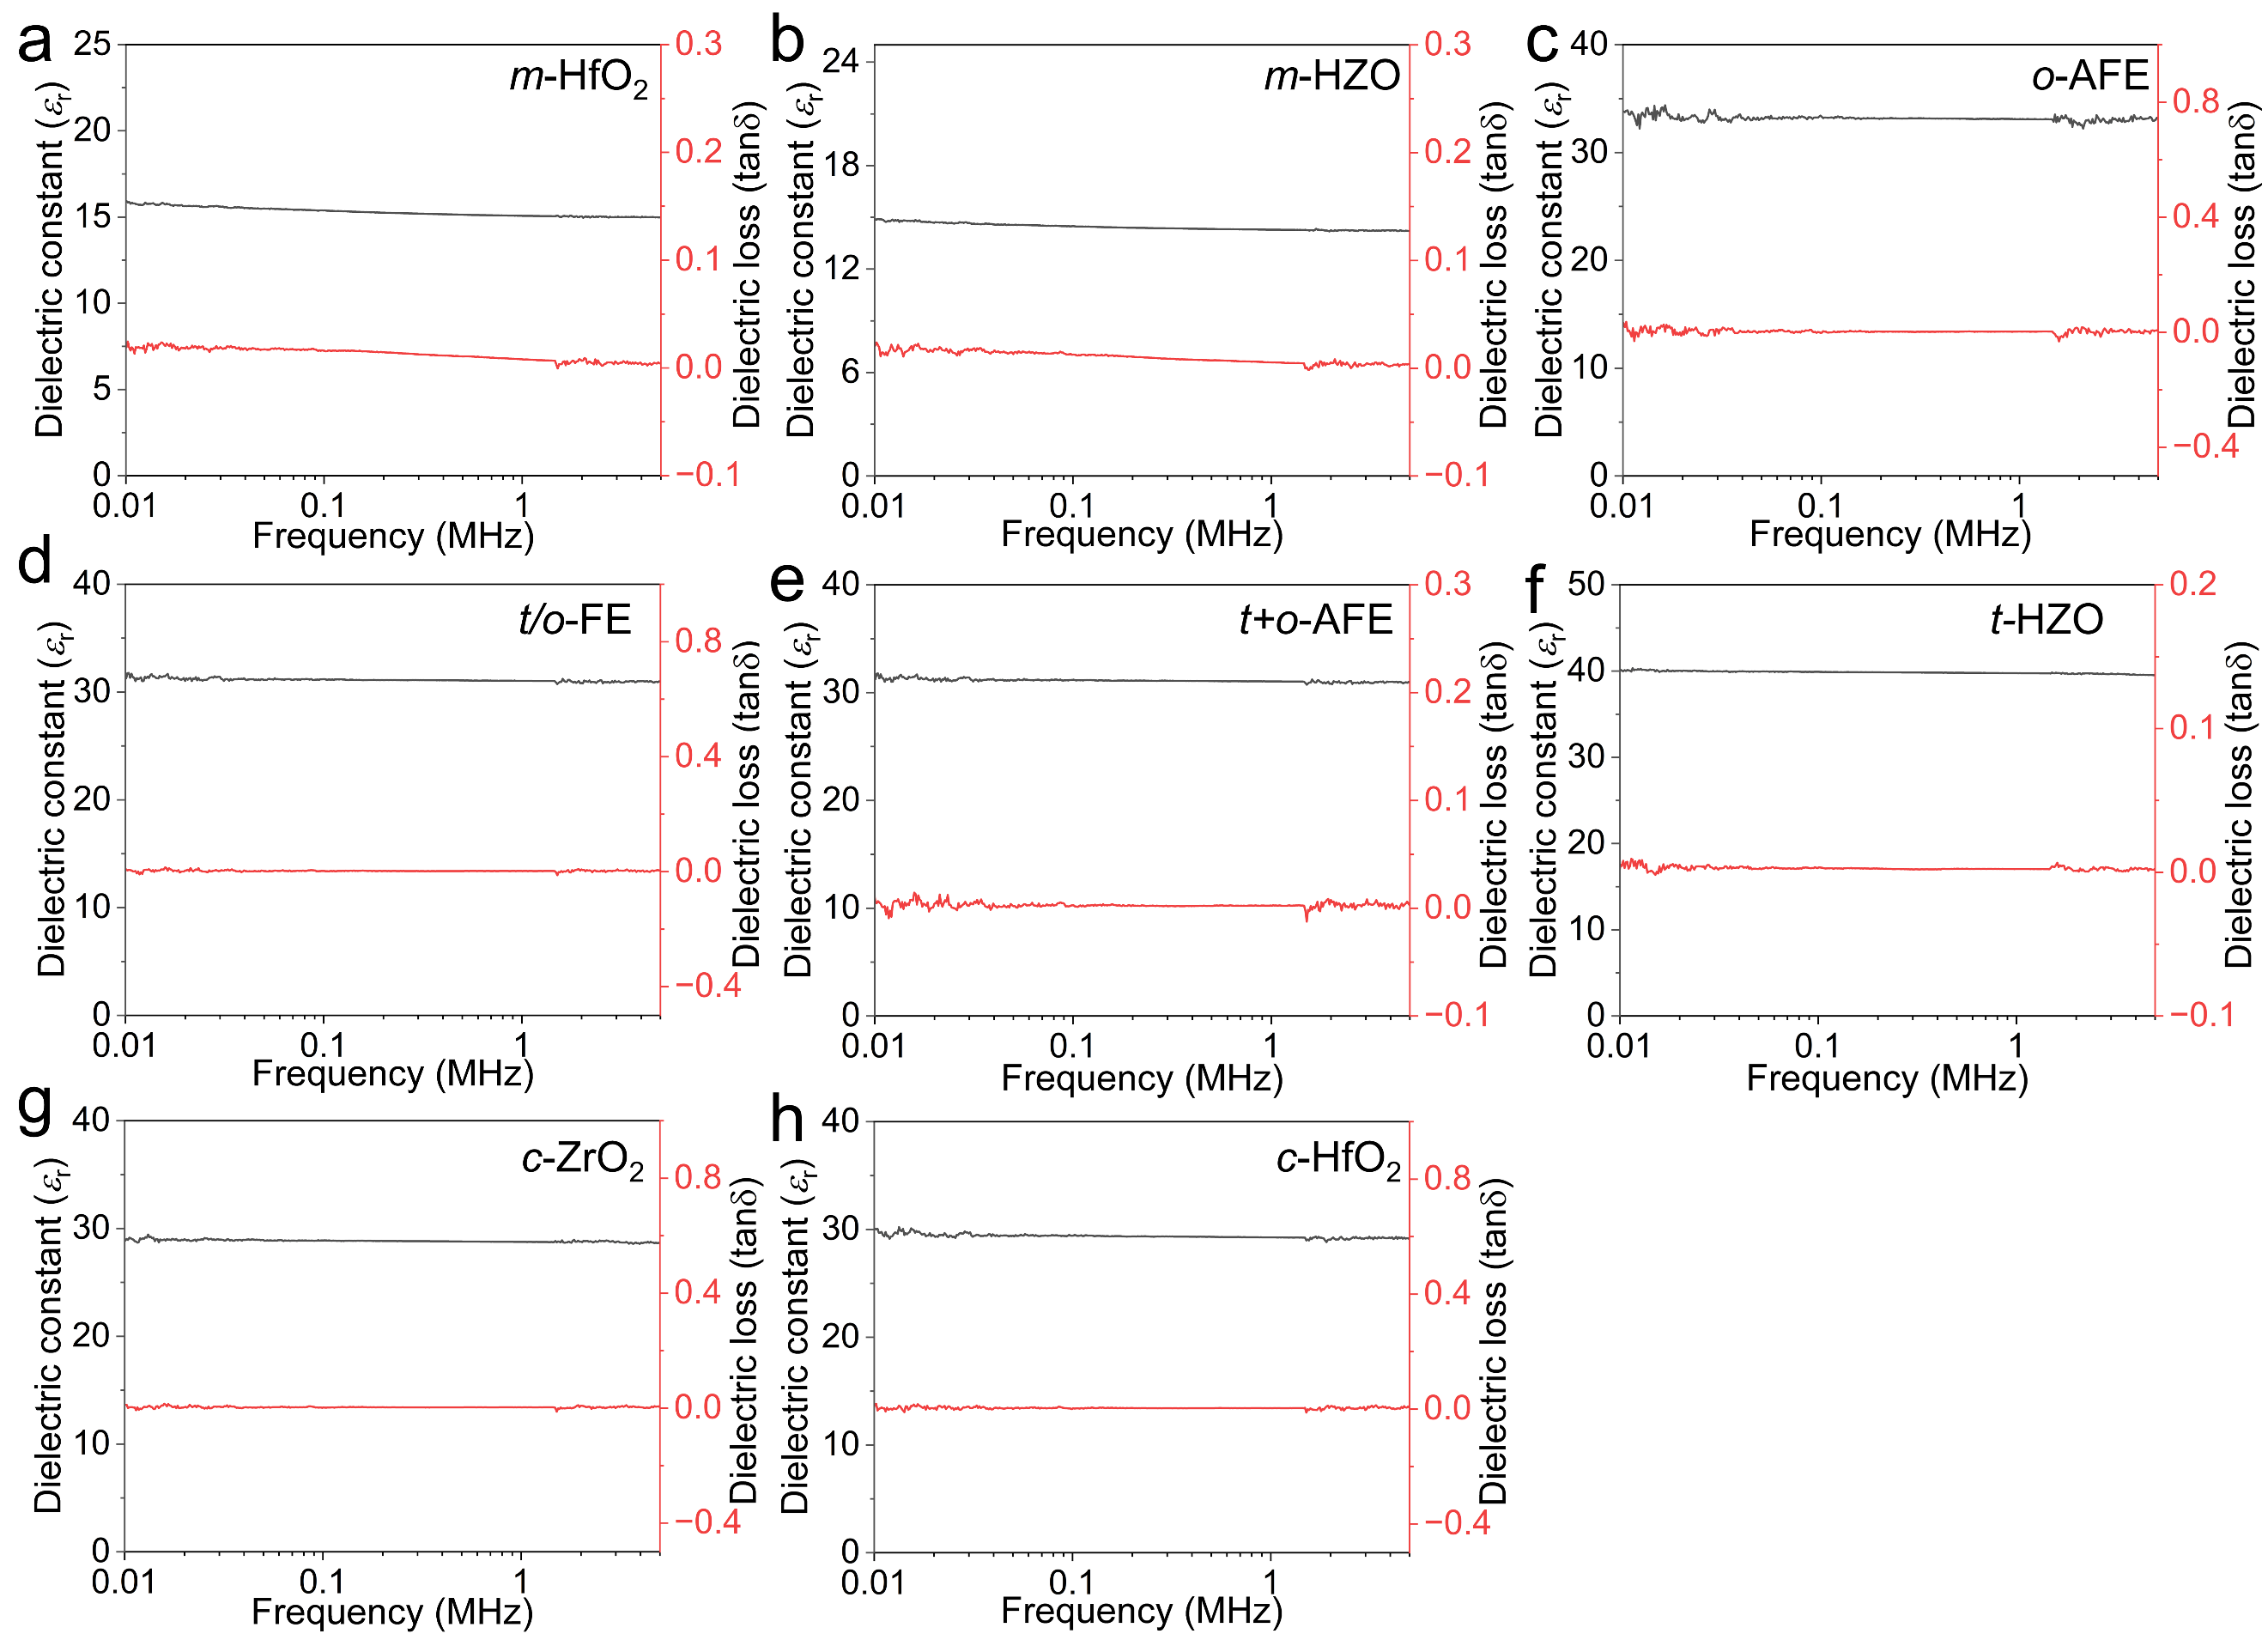


**Supplementary Fig. 6.** **Room-temperature frequency-dependent dielectric constant and dielectric loss for different samples shown Fig. 2d.** **a**, *m*-HfO2, **b**, *m*-HZO, **c**, *o*-AFE, **d**, *t*/*o*-FE, **e**, *t*+*o*-AFE, **f**, *t*-HZO, **g**, *c*-HfO2, **h**, *c*-ZrO2.


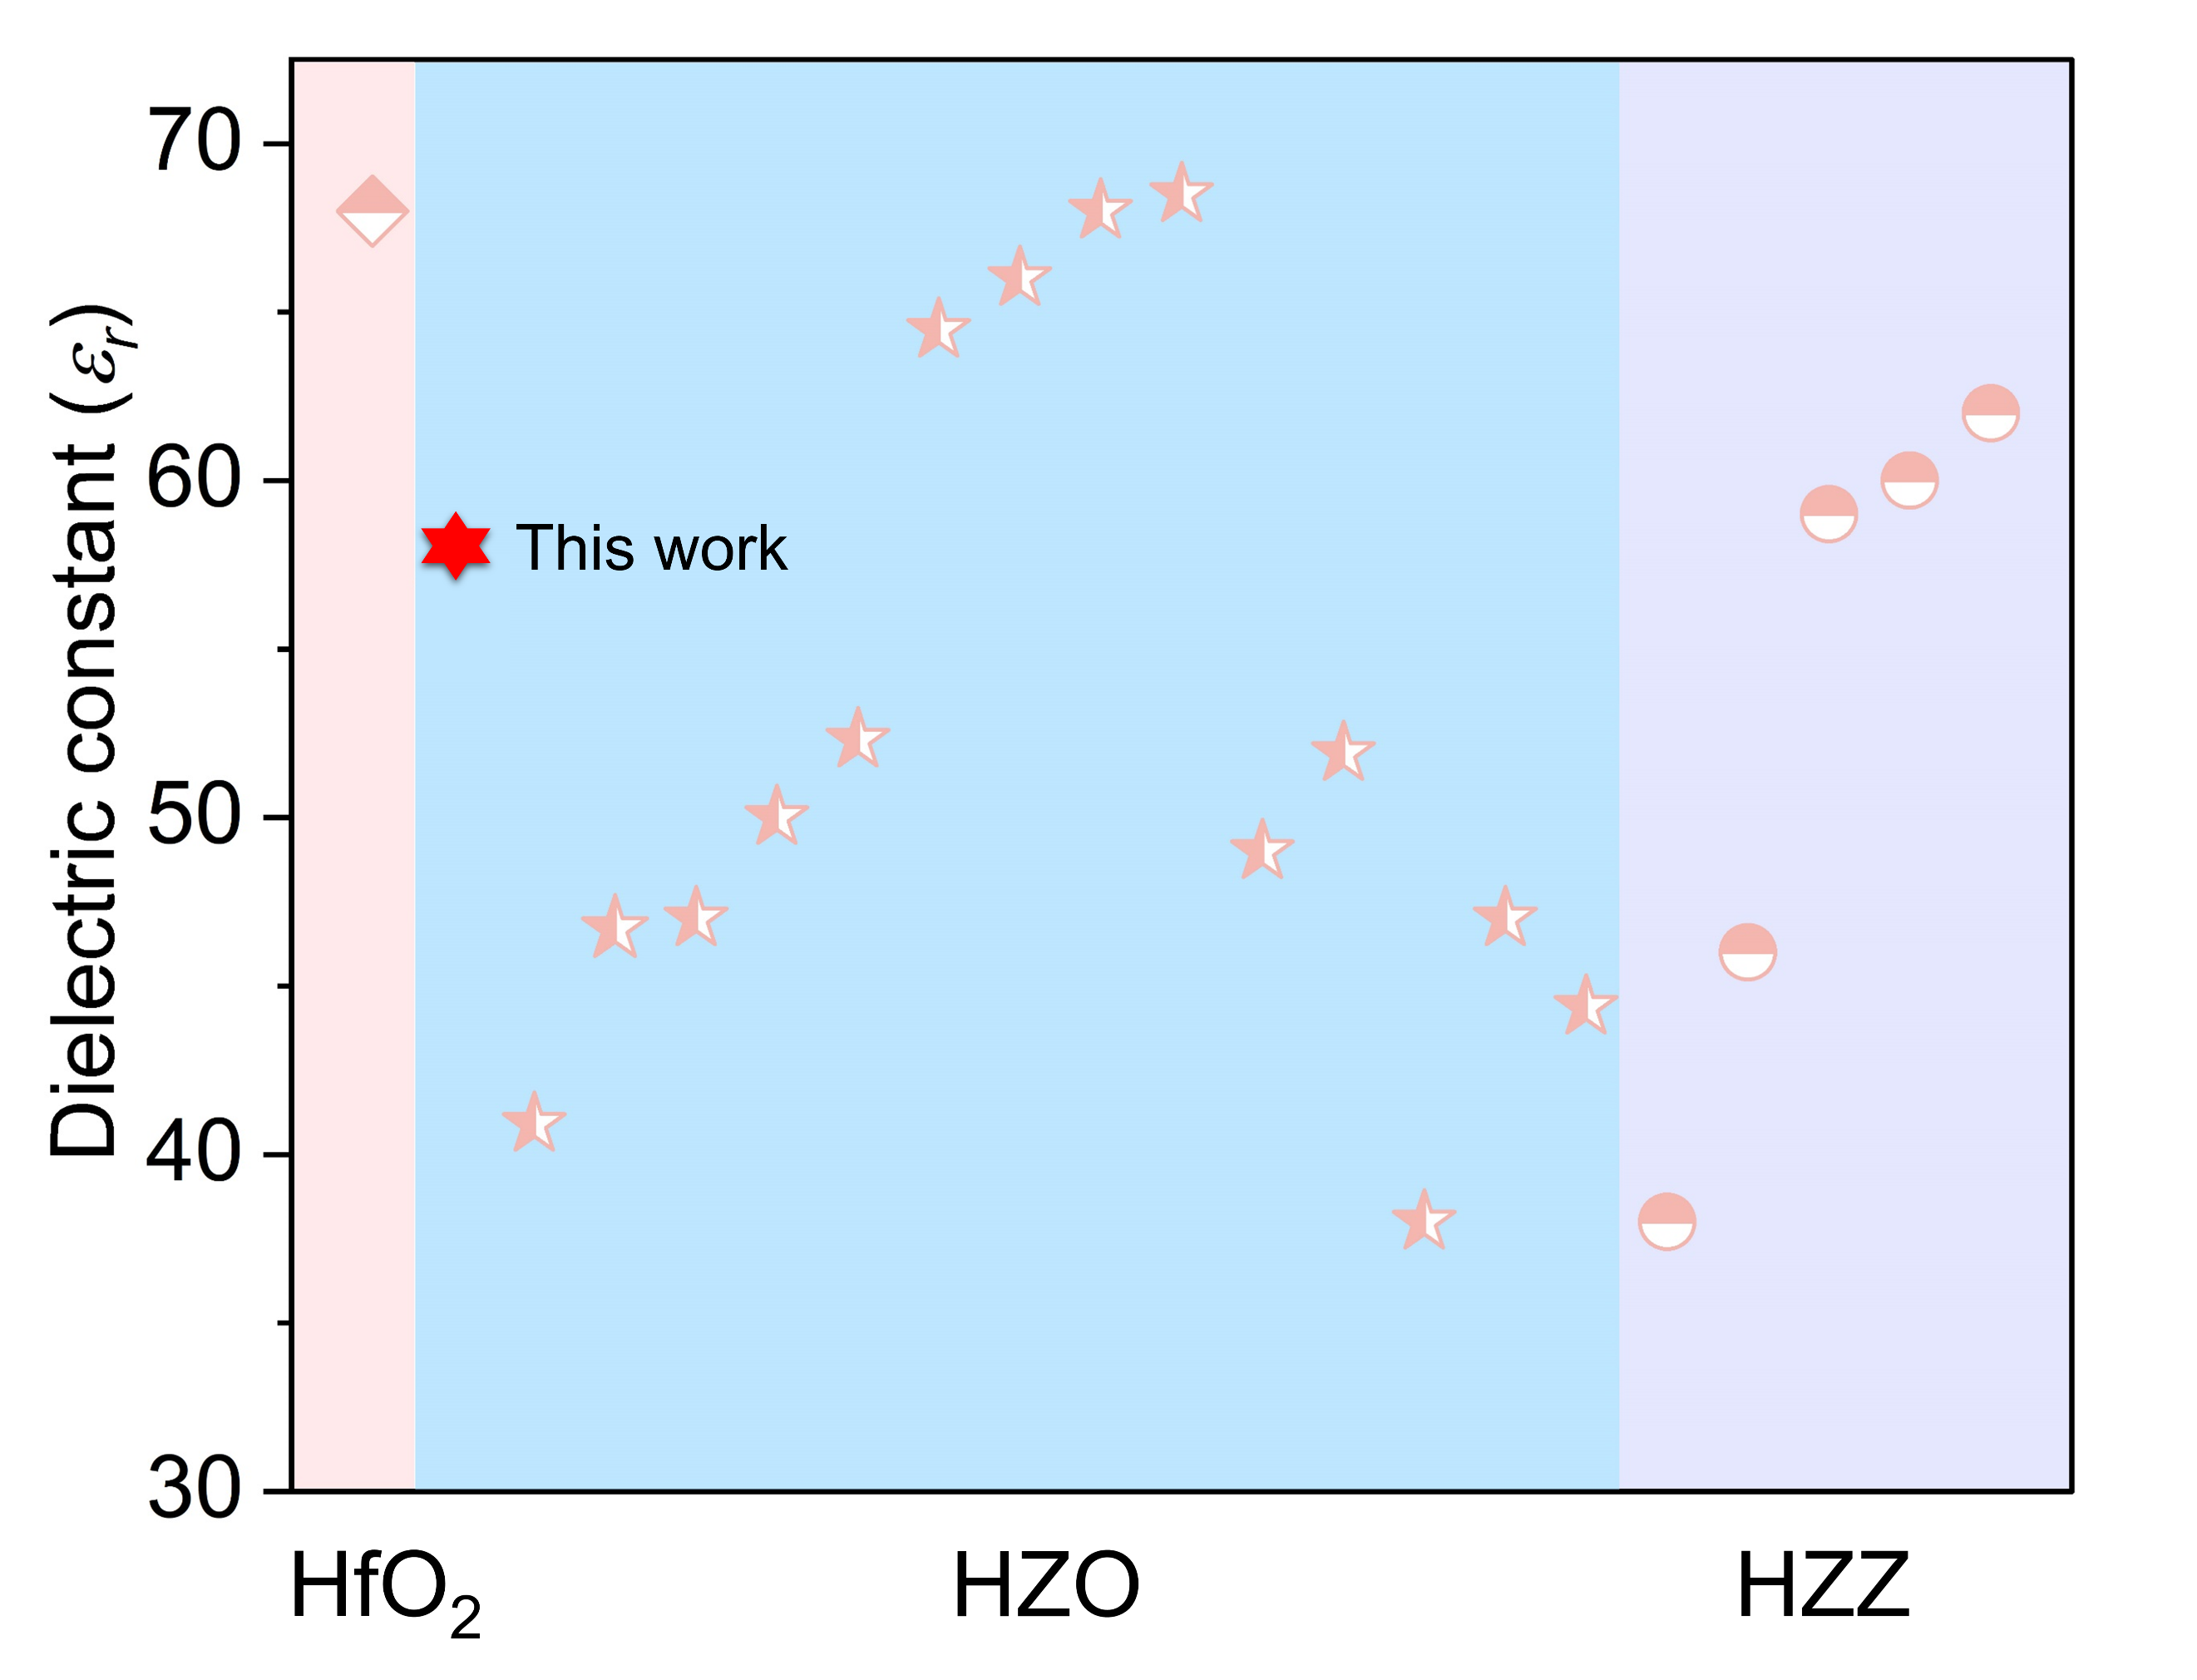


**Supplementary Fig. 7.** **Reported dielectric constant for the HfO2-based materials, including the HfO2, HZO, and HZZ.** The pink, cyan, and purple regions show the dielectric constant of the HfO2-based materials with the matrix of the HfO2, HZO, and HZZ, respectively. The region of HfO2 includes the Al:HfO2 (68). The region of HZO includes various Hf:Zr ratio materials. HZZ is denoted as the nanolaminate structure films2-21.


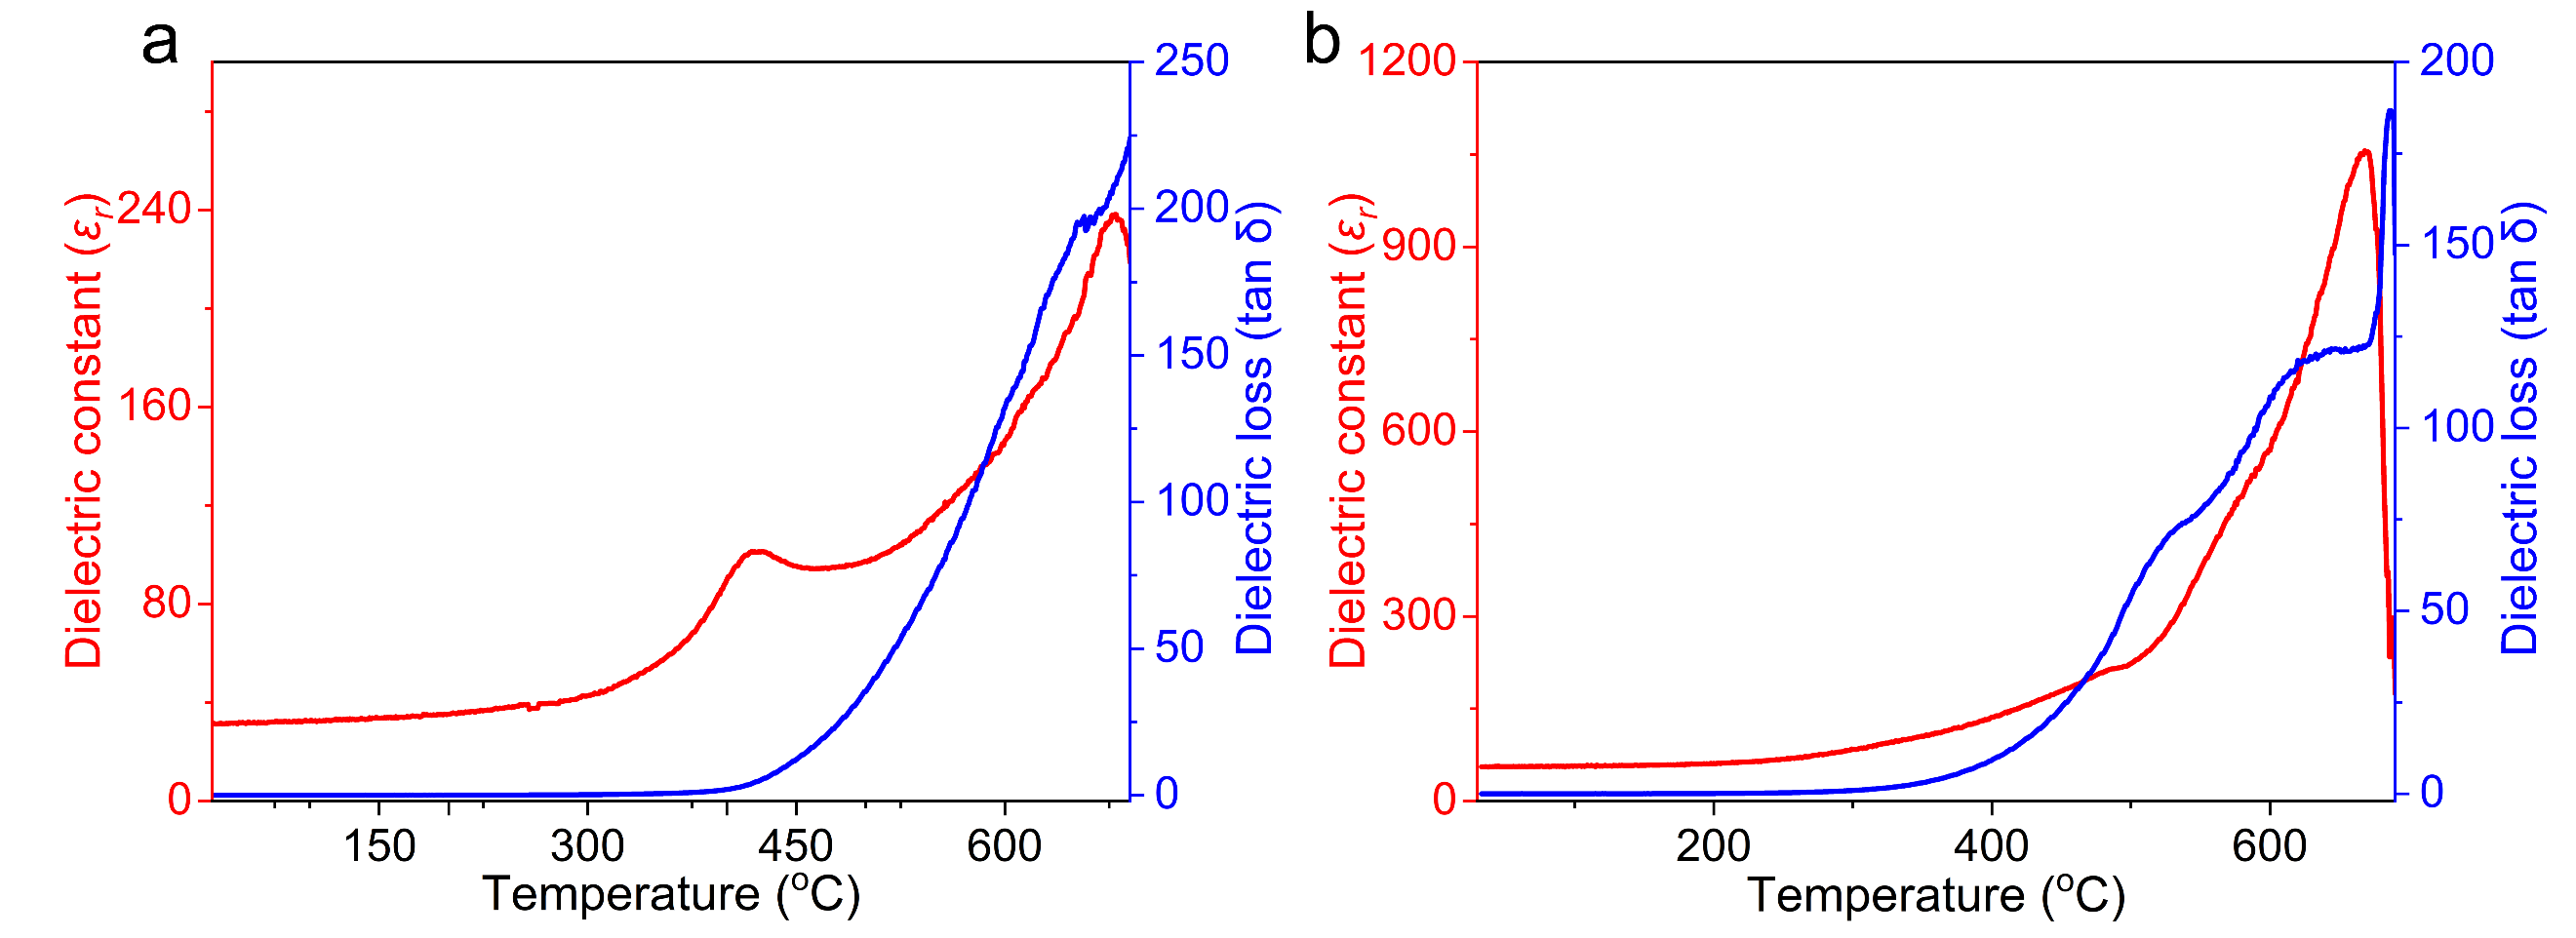


**Supplementary Fig. 8.** **Temperature-dependent dielectric constant and loss at 100 kHz. a**, For the *t*/*o*-FE MPB sample. **b**, For the *t*/*o*-AFE MPB sample.


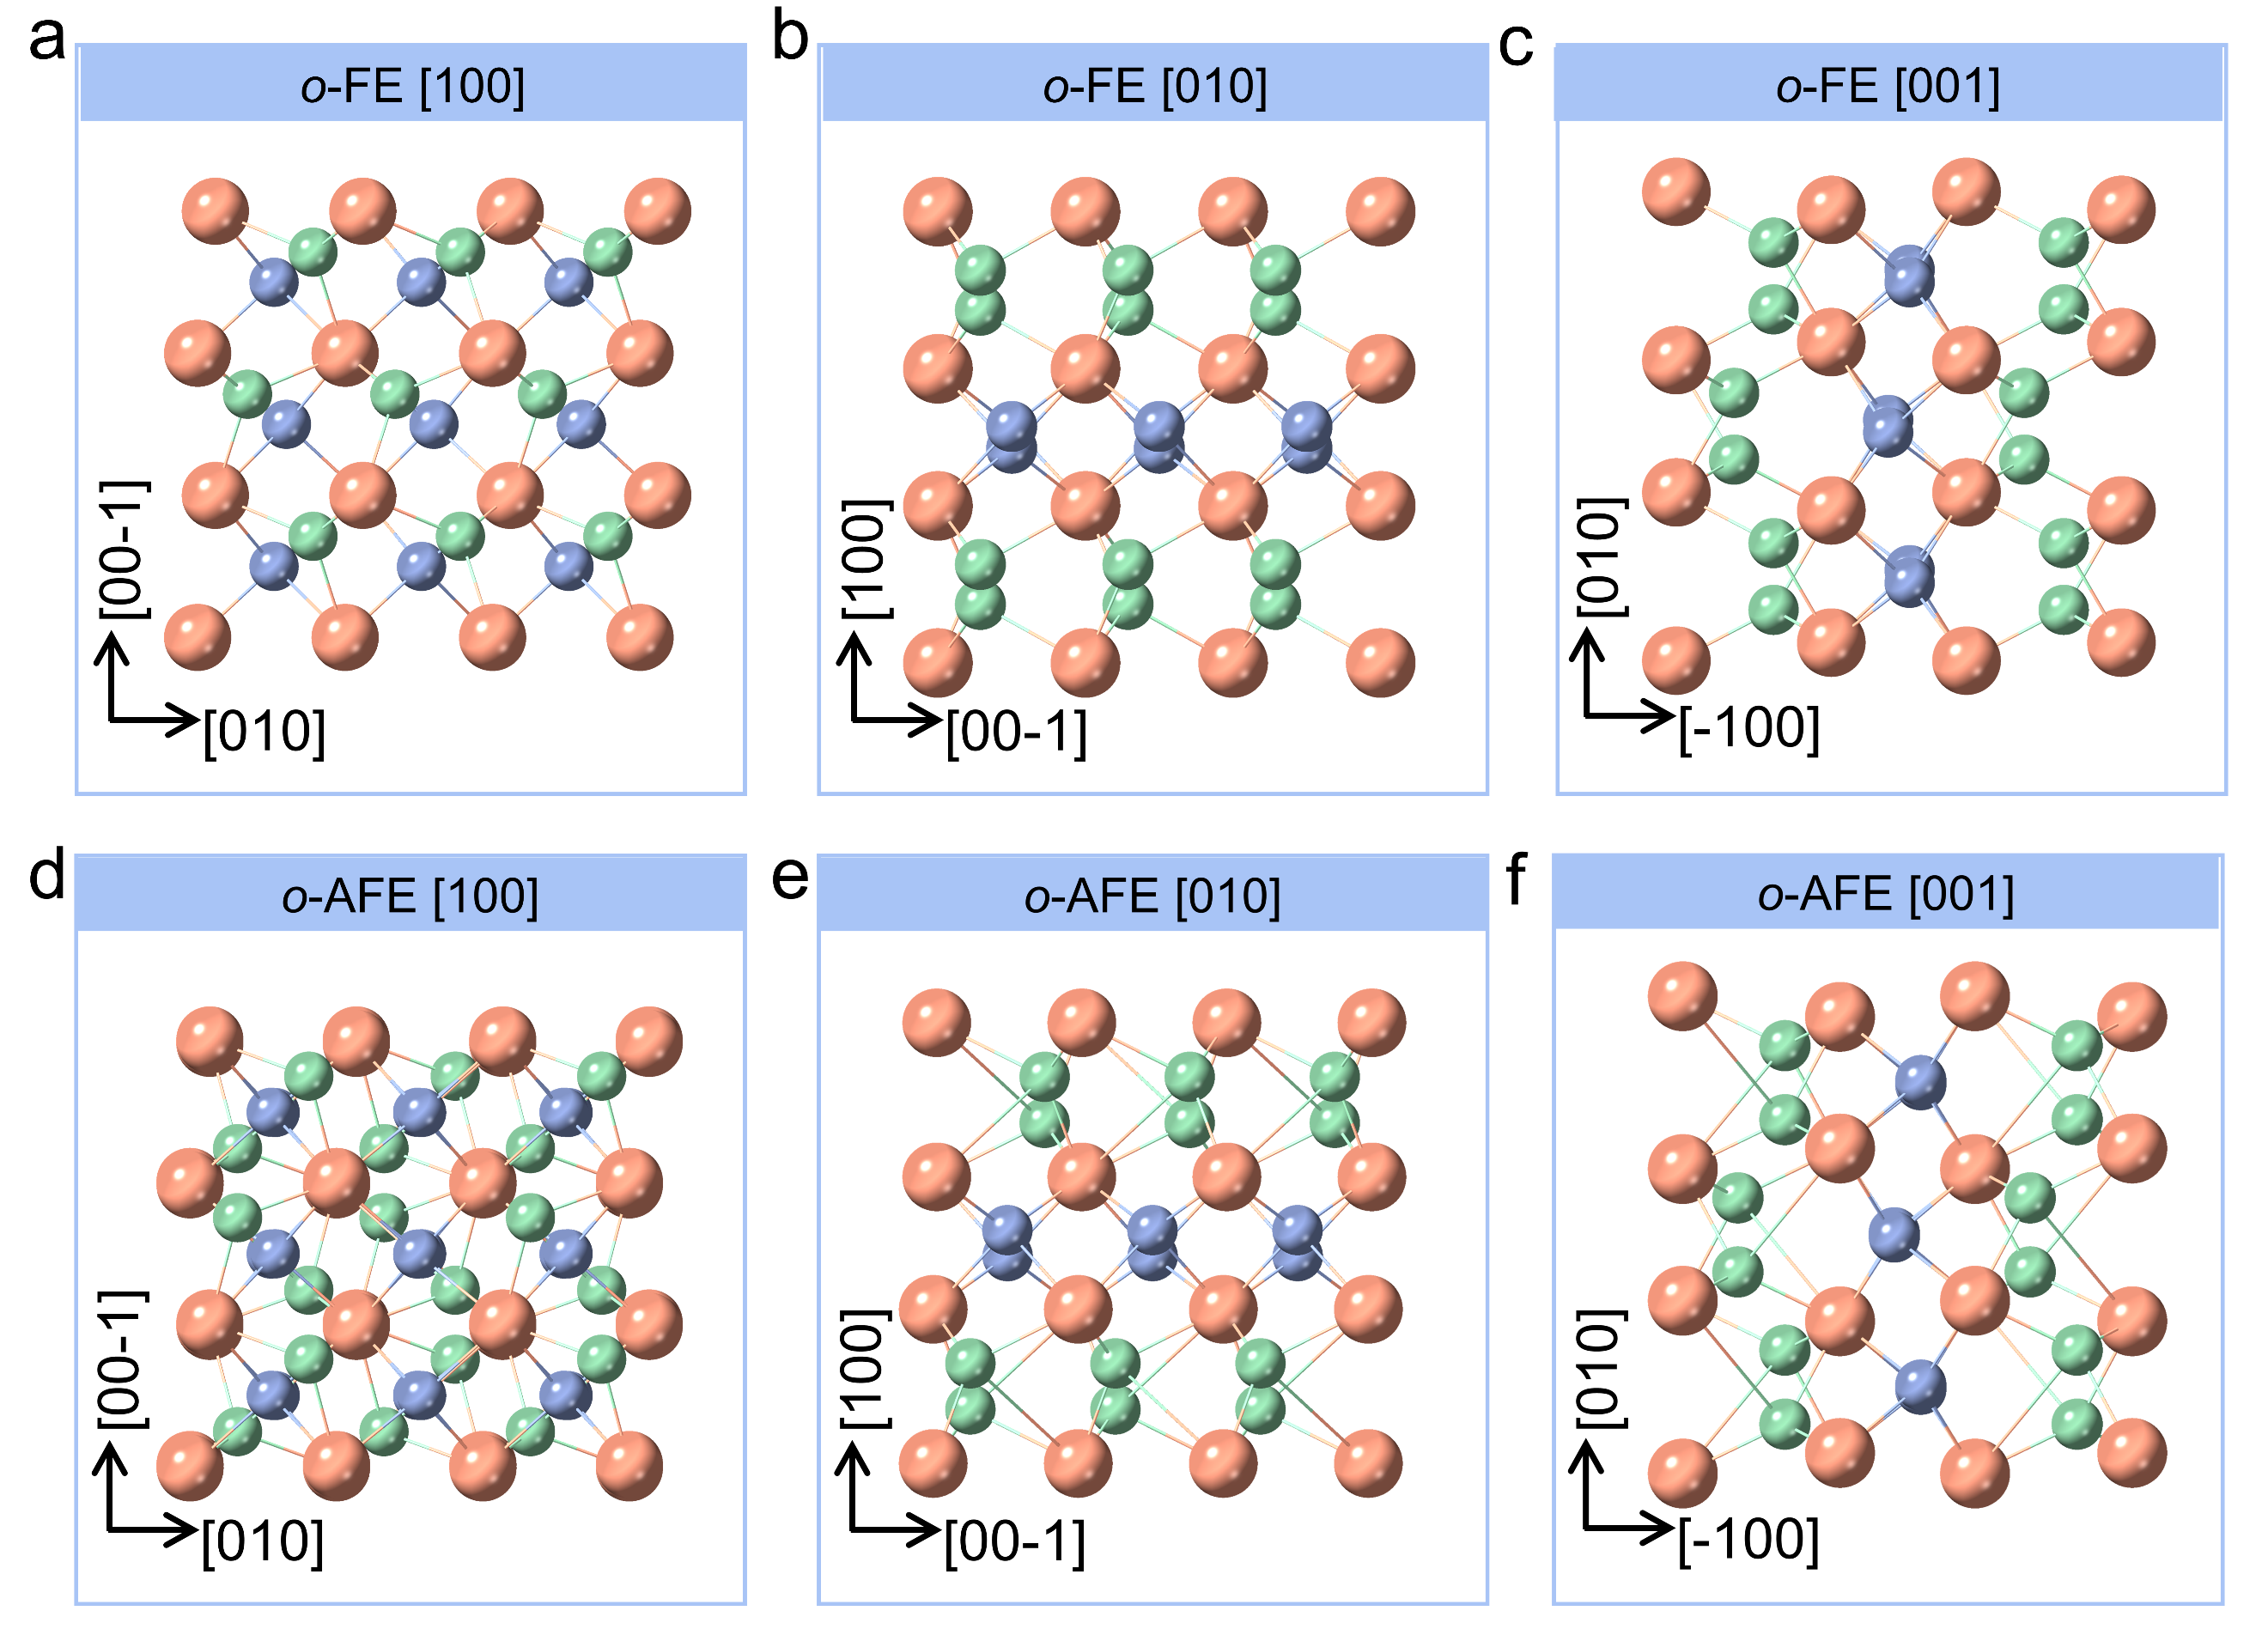


**Supplementary Fig. 9.** **Structural schematics corresponding to the different *o* phases.** **a-c**, Atomic arrangement along the *a*-axis, *b*-axis, and *c*-axis of the *o*-FE phase, respectively. **d-f**, Atomic arrangement along the *a*-axis, *b*-axis, and *c*-axis of the *o*-AFE phase, respectively.


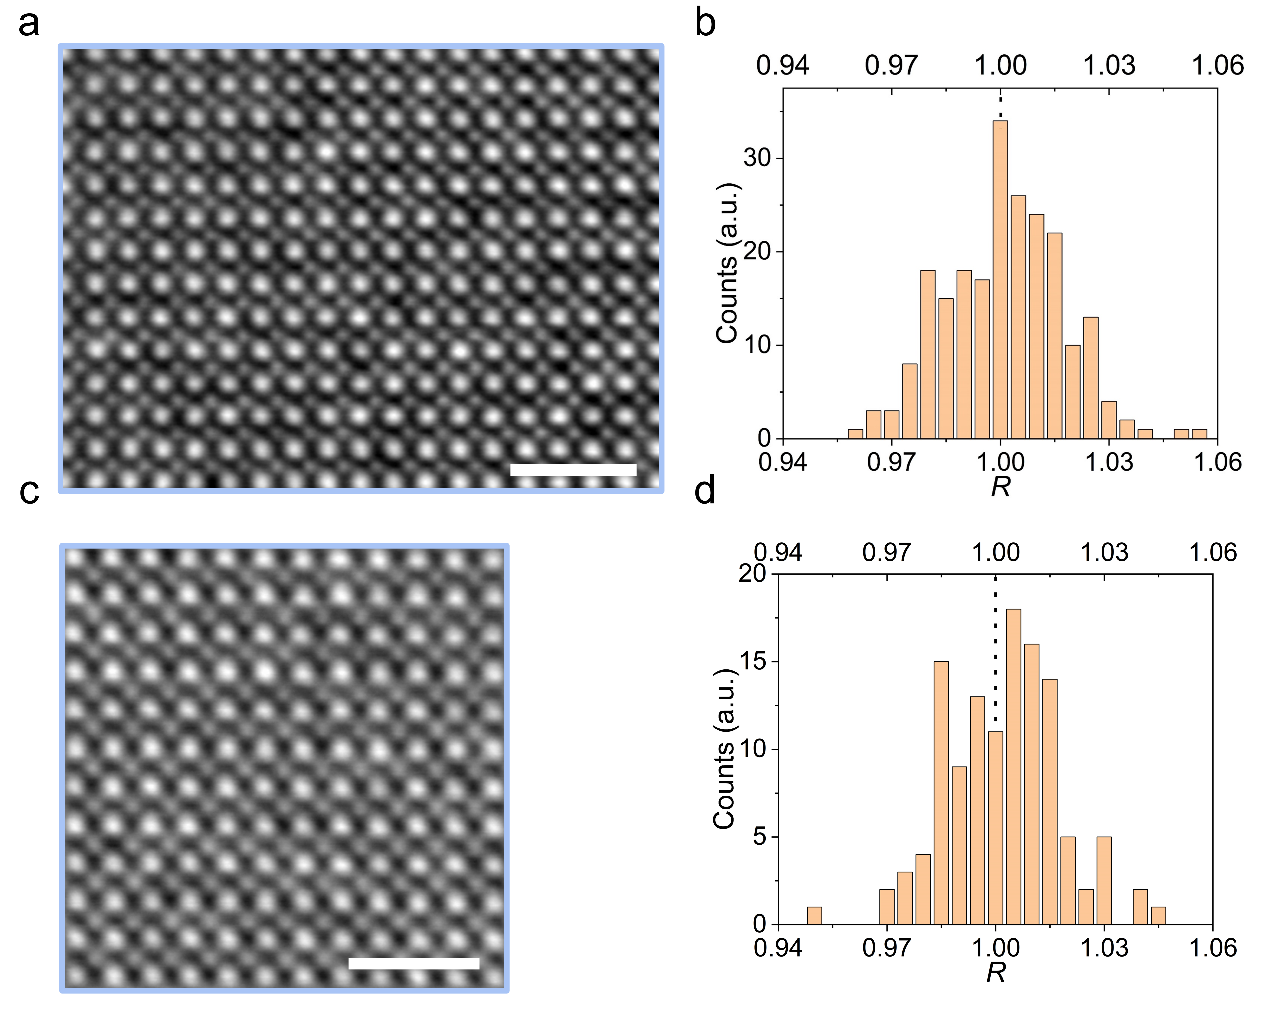


**Supplementary Fig. 10.** **Original STEM image and *R*-value statistical histogram of the *t* phase shown in Fig. 4h,i.** Supplementary Fig. 10a,b and Supplementary Fig. 10c,d correspond to Fig. 4h and Fig. 4i, respectively. Scale bar: 1 nm.


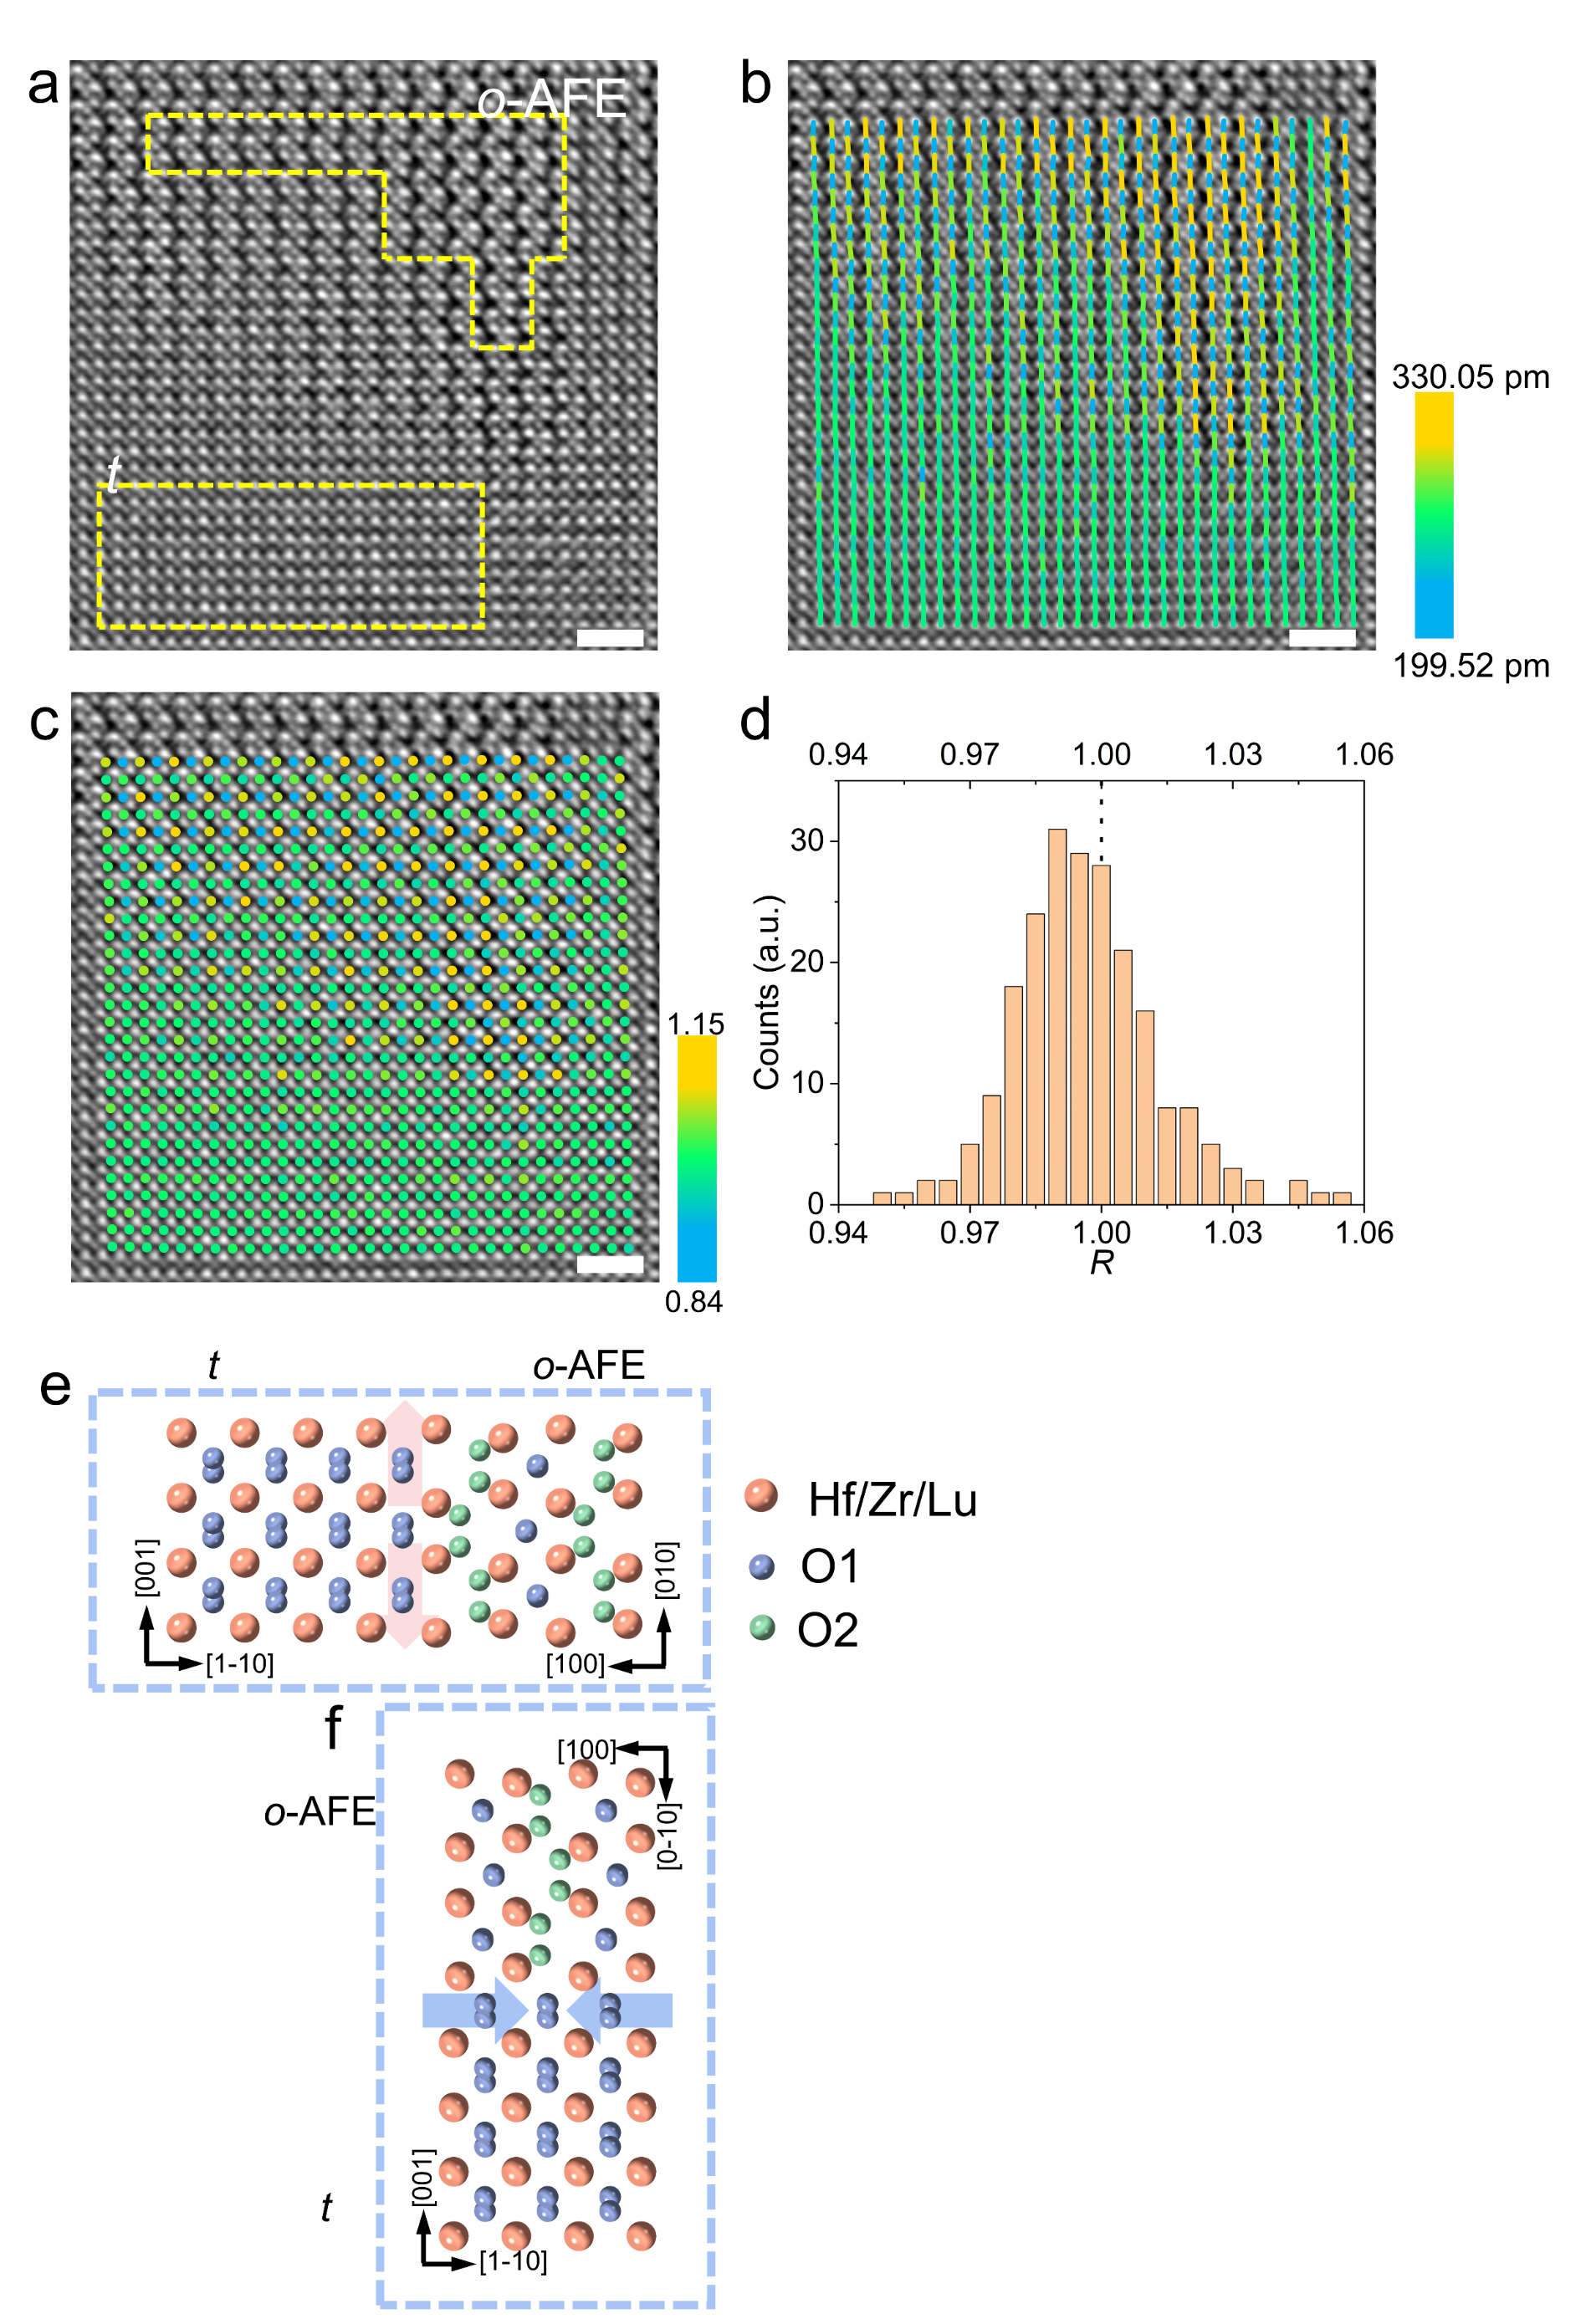


**Supplementary Fig. 11.** **Observed *t*/*o* coherent interfaces within *Crystal* 2, with the *c*-axis observation direction of the *o*-AFE phase.** **a**, Raw iDPC-STEM imaging, with the *t* and *o*-AFE phase identification. **b**, iDPC-STEM imaging with the corresponding Hf-Hf distance. **c**, iDPC-STEM imaging with the corresponding *R*-value distribution. Scale bar: 1 nm. **d**,S**tatistical histogram of the *R*-value for the *t* phase enclosed by the dashed line in Supplementary Fig. 11a.** **e**, **f**, **Structural schematic diagram of the strain relationship on the *t* phase induced by the *o*-AFE phase corresponding to the strain state. For (e),** *Case-*(2) (*ct* // *bo*-AFE); **For (f),** *Case-*(4) (<110>*t* // *ao*-AFE)**.** The strains are calculated based on the average Hf-Hf bond length of the *t* and *o*-AFE phase regions **enclosed by the dashed line in Supplementary Fig. 11a**. The average vertical and horizontal strains in the *t* phase are 1.56% and -0.42%, respectively.


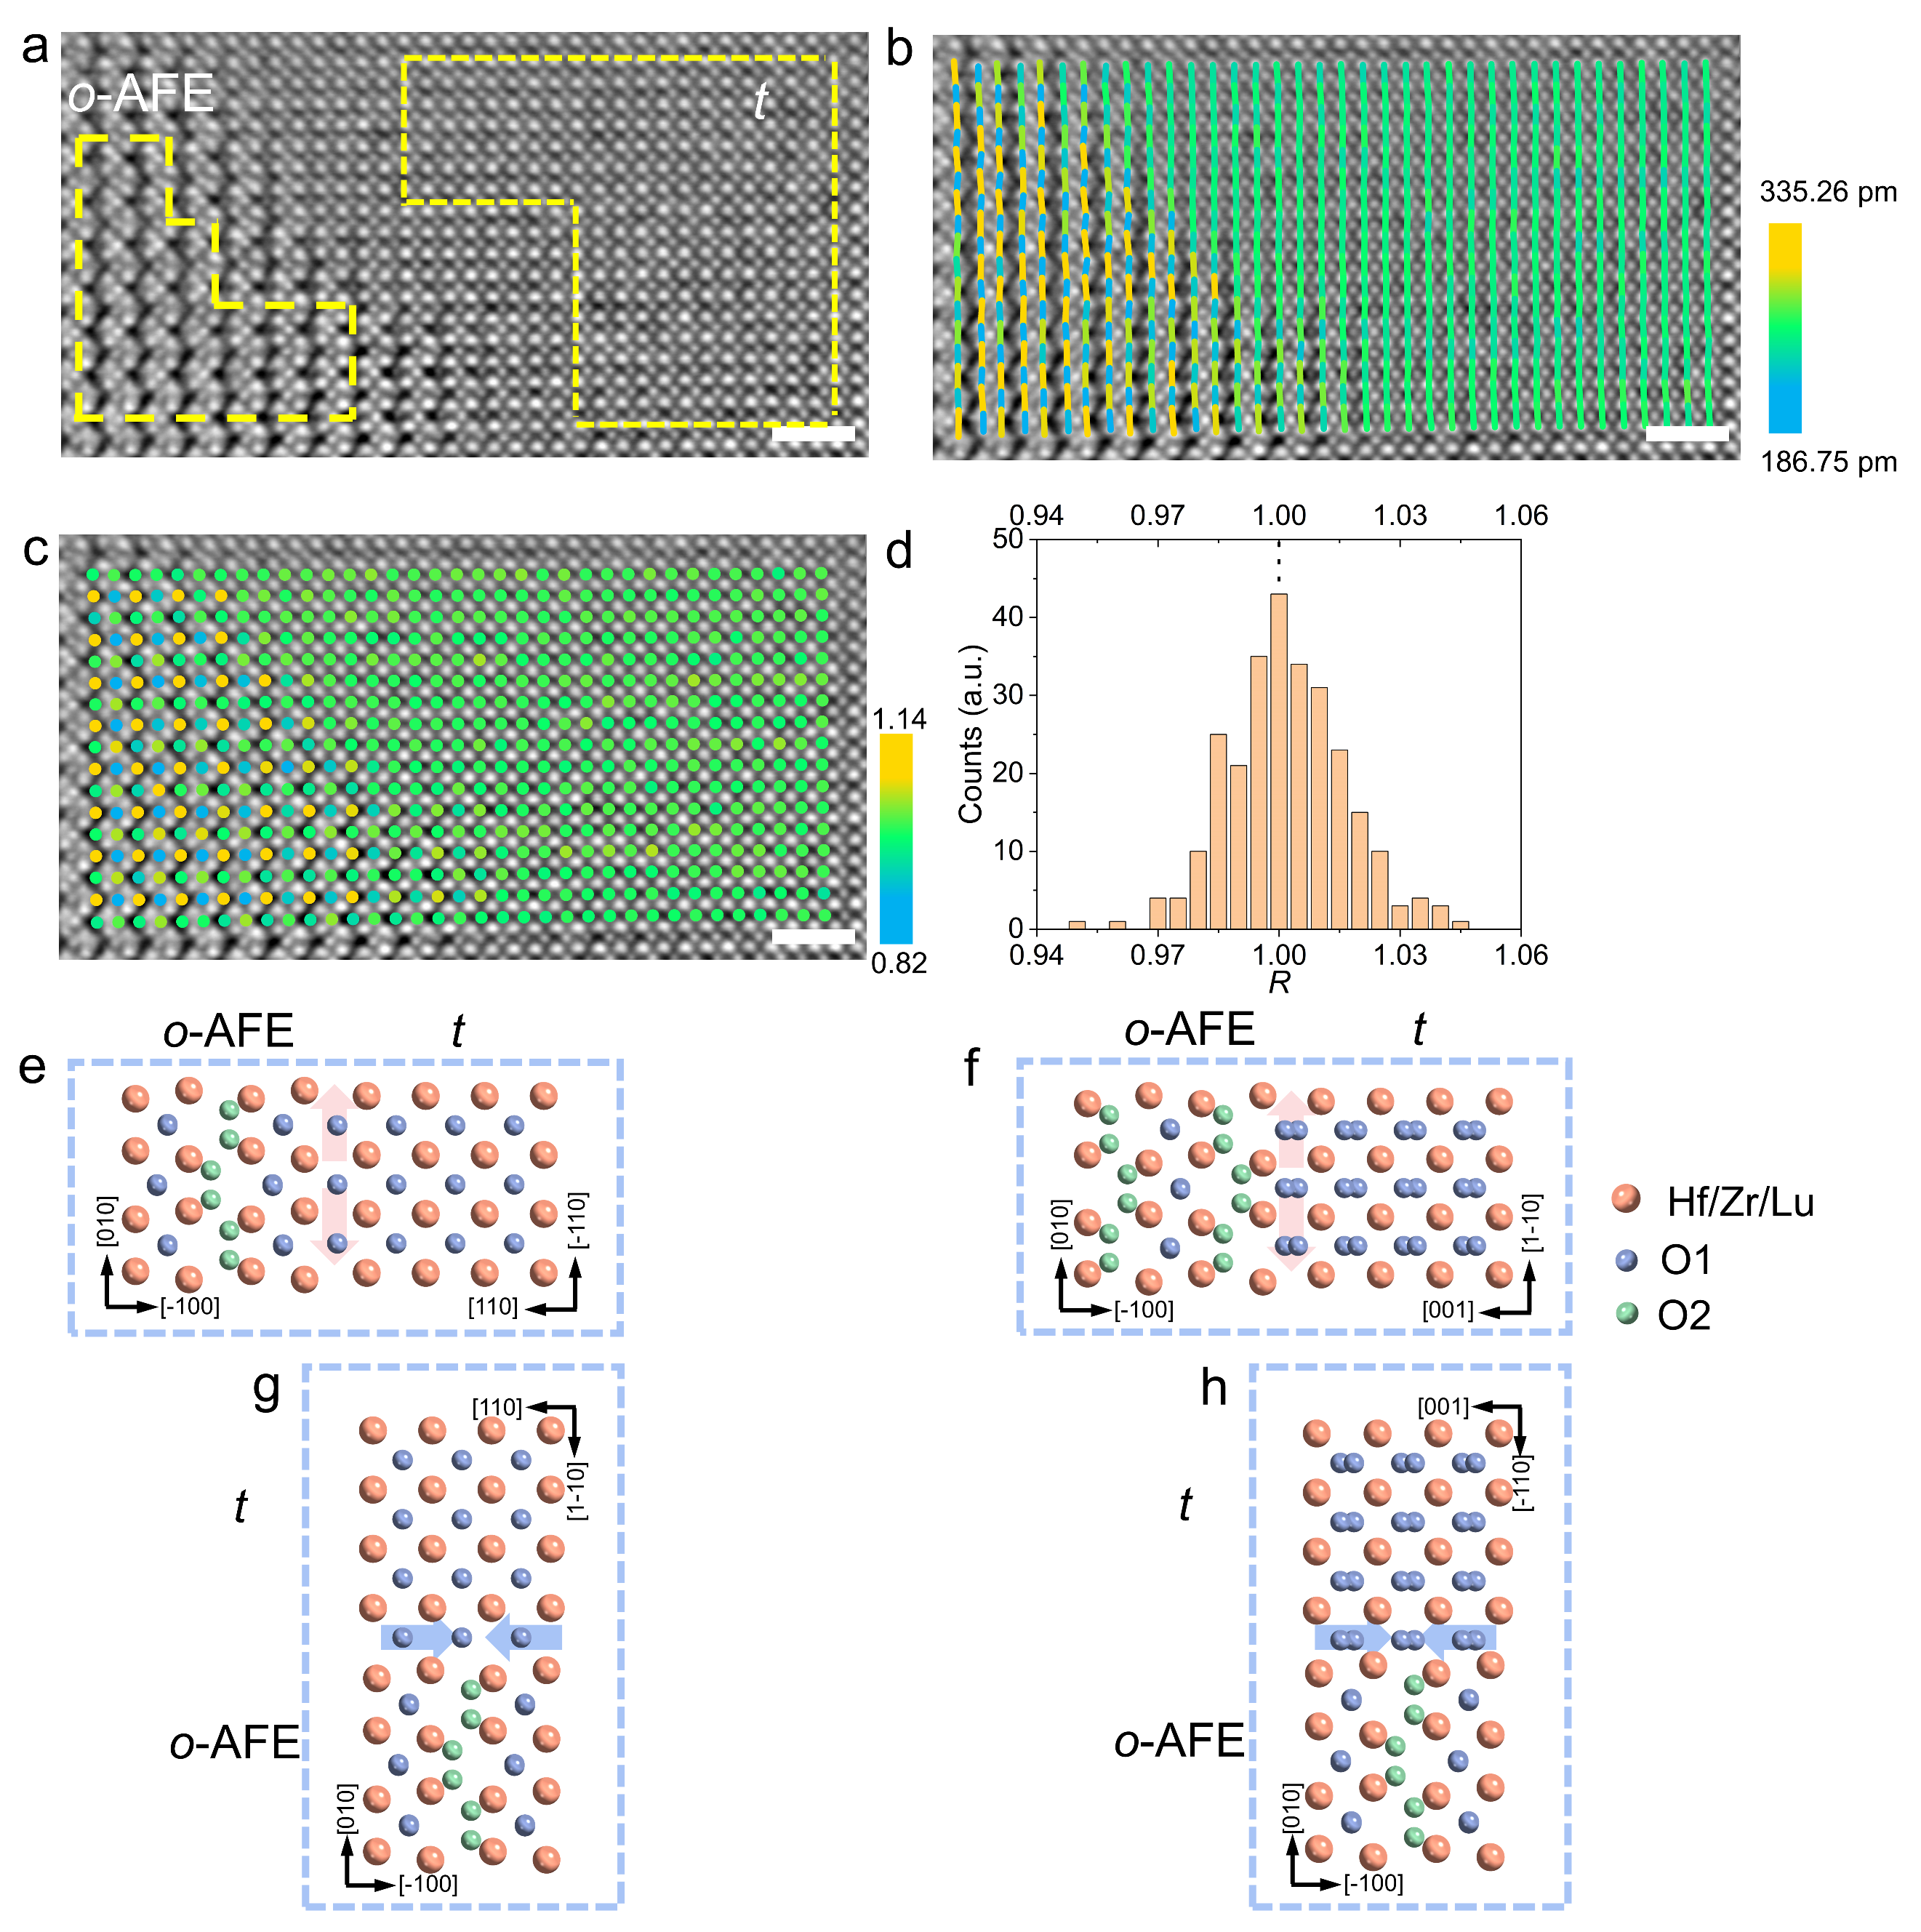


**Supplementary Fig. 12. Observed *t*/*o* coherent interfaces within *Crystal* 2, with the *c*-axis observation direction of the *o*-AFE phase.** **a**, Raw iDPC-STEM imaging. **b**, iDPC-STEM imaging with the corresponding Hf-Hf distance. **c**, iDPC-STEM imaging with the corresponding *R*-value distribution. Scale bar: 1 nm. **d**, **Statistical histogram of the *R*-value for the *t* phase enclosed by the dashed line in Supplementary Fig. 12a.** **e-h**, **Structural schematic diagrams of the strain relationship on the *t* phase induced by the *o*-AFE phase corresponding to the strain state. For (e),** *Case-*(1) (<110>*t* // *bo*-AFE); **For (f),** *Case-*(1) (<110>*t* // *bo*-AFE)**; For (g),** *Case-*(4) (<110>*t* // *ao*-AFE); **For (h),** *Case-*(6) (*ct* // *ao*-AFE)**.** The strains are calculated based on the average Hf-Hf bond length of the *t* and *o*-AFE phase regions **enclosed by the dashed line in Supplementary Fig. 12a**. The average vertical and horizontal strains in the *t* phase are 2.34% and -0.72%, respectively.


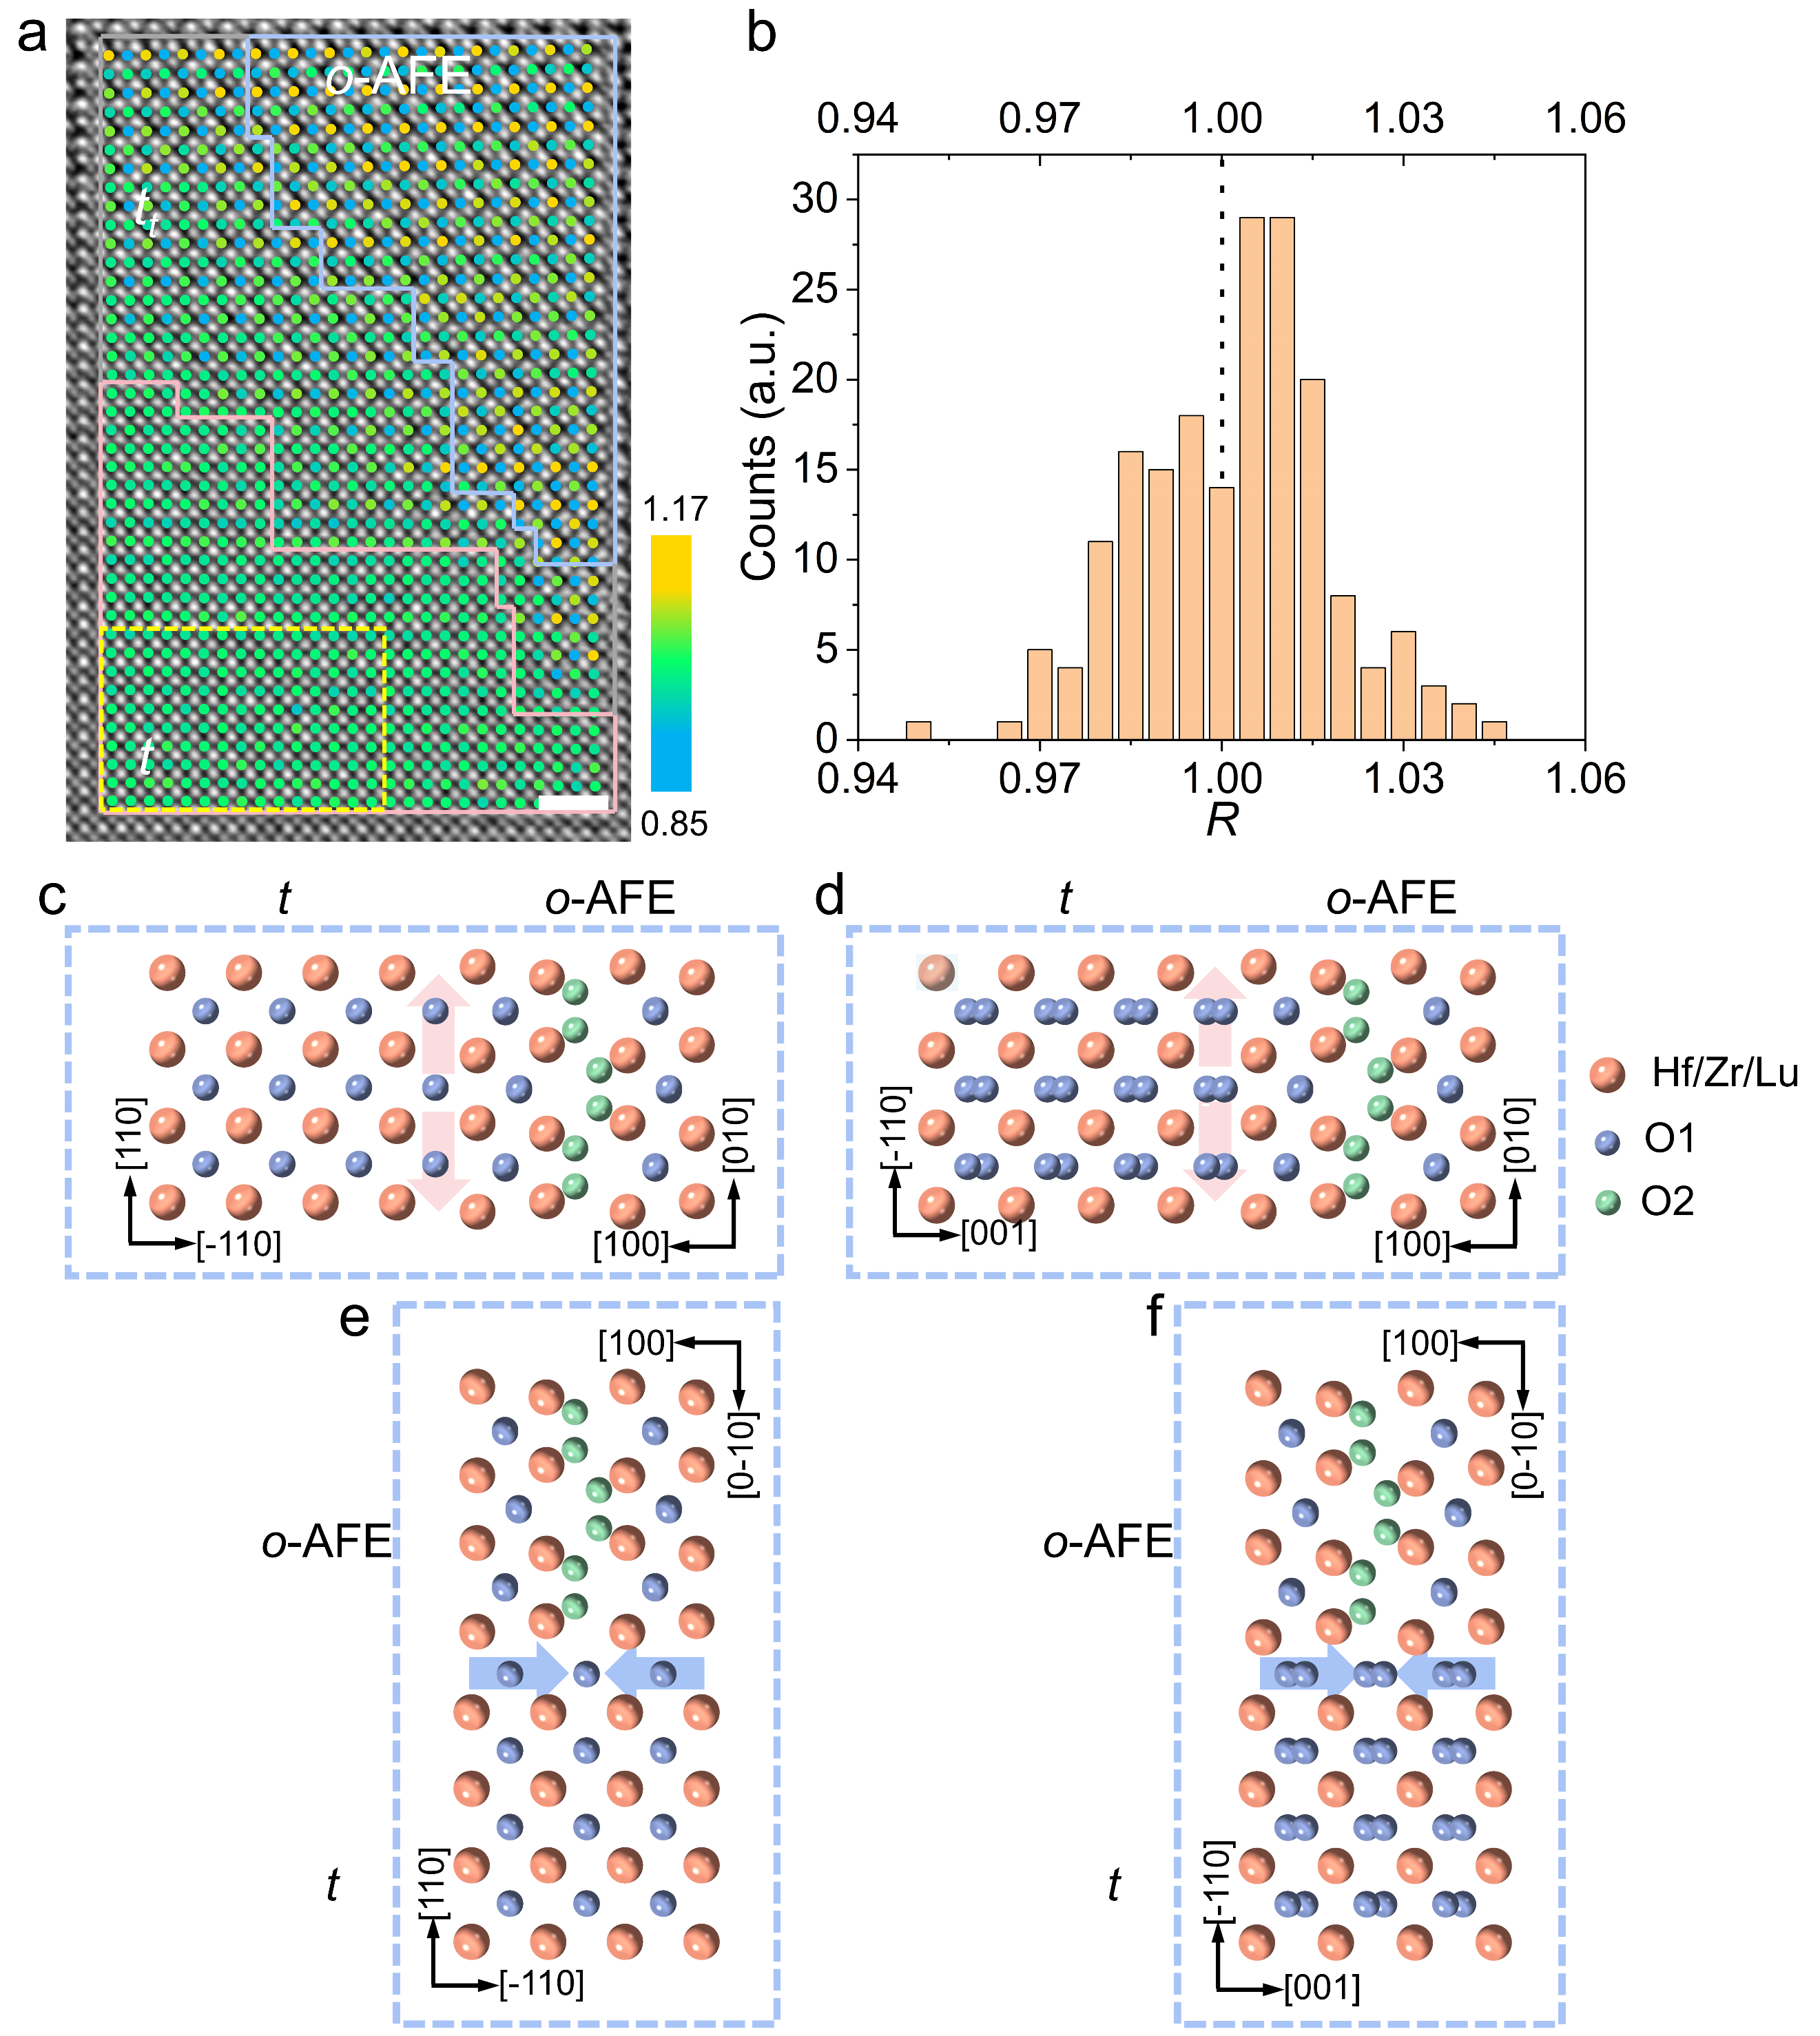


**Supplementary Fig. 13. *t*/*o* coherent interfaces shown in Fig. 5b, with the *c*-axis observation direction of the *o*-AFE phase.** **a**,*R*-value distribution for the coherent interface shown in Fig. 5b. Scale bar: 1 nm. **b**, S**tatistical histogram of the *R*-value** for the *t* phase **enclosed by the yellow dashed line** in Fig. 5b. **c-f**, **Structural schematic diagrams of the strain relationship in the *t* phase induced by the *o*-AFE phase. The observation direction of the *o*-AFE phase corresponds to the *c*-axis. The observation directions of the *t* phase are along the *c*-axis,and** <110>, respectively. **The strain states correspond to** *Case-*(1) (<110>*t* // *bo*-AFE), *Case-*(1) (<110>*t* // *bo*-AFE), *Case-*(4) (<110>*t* // *ao*-AFE), *Case-*(6) (*ct* // *ao*-AFE), respectively**.**


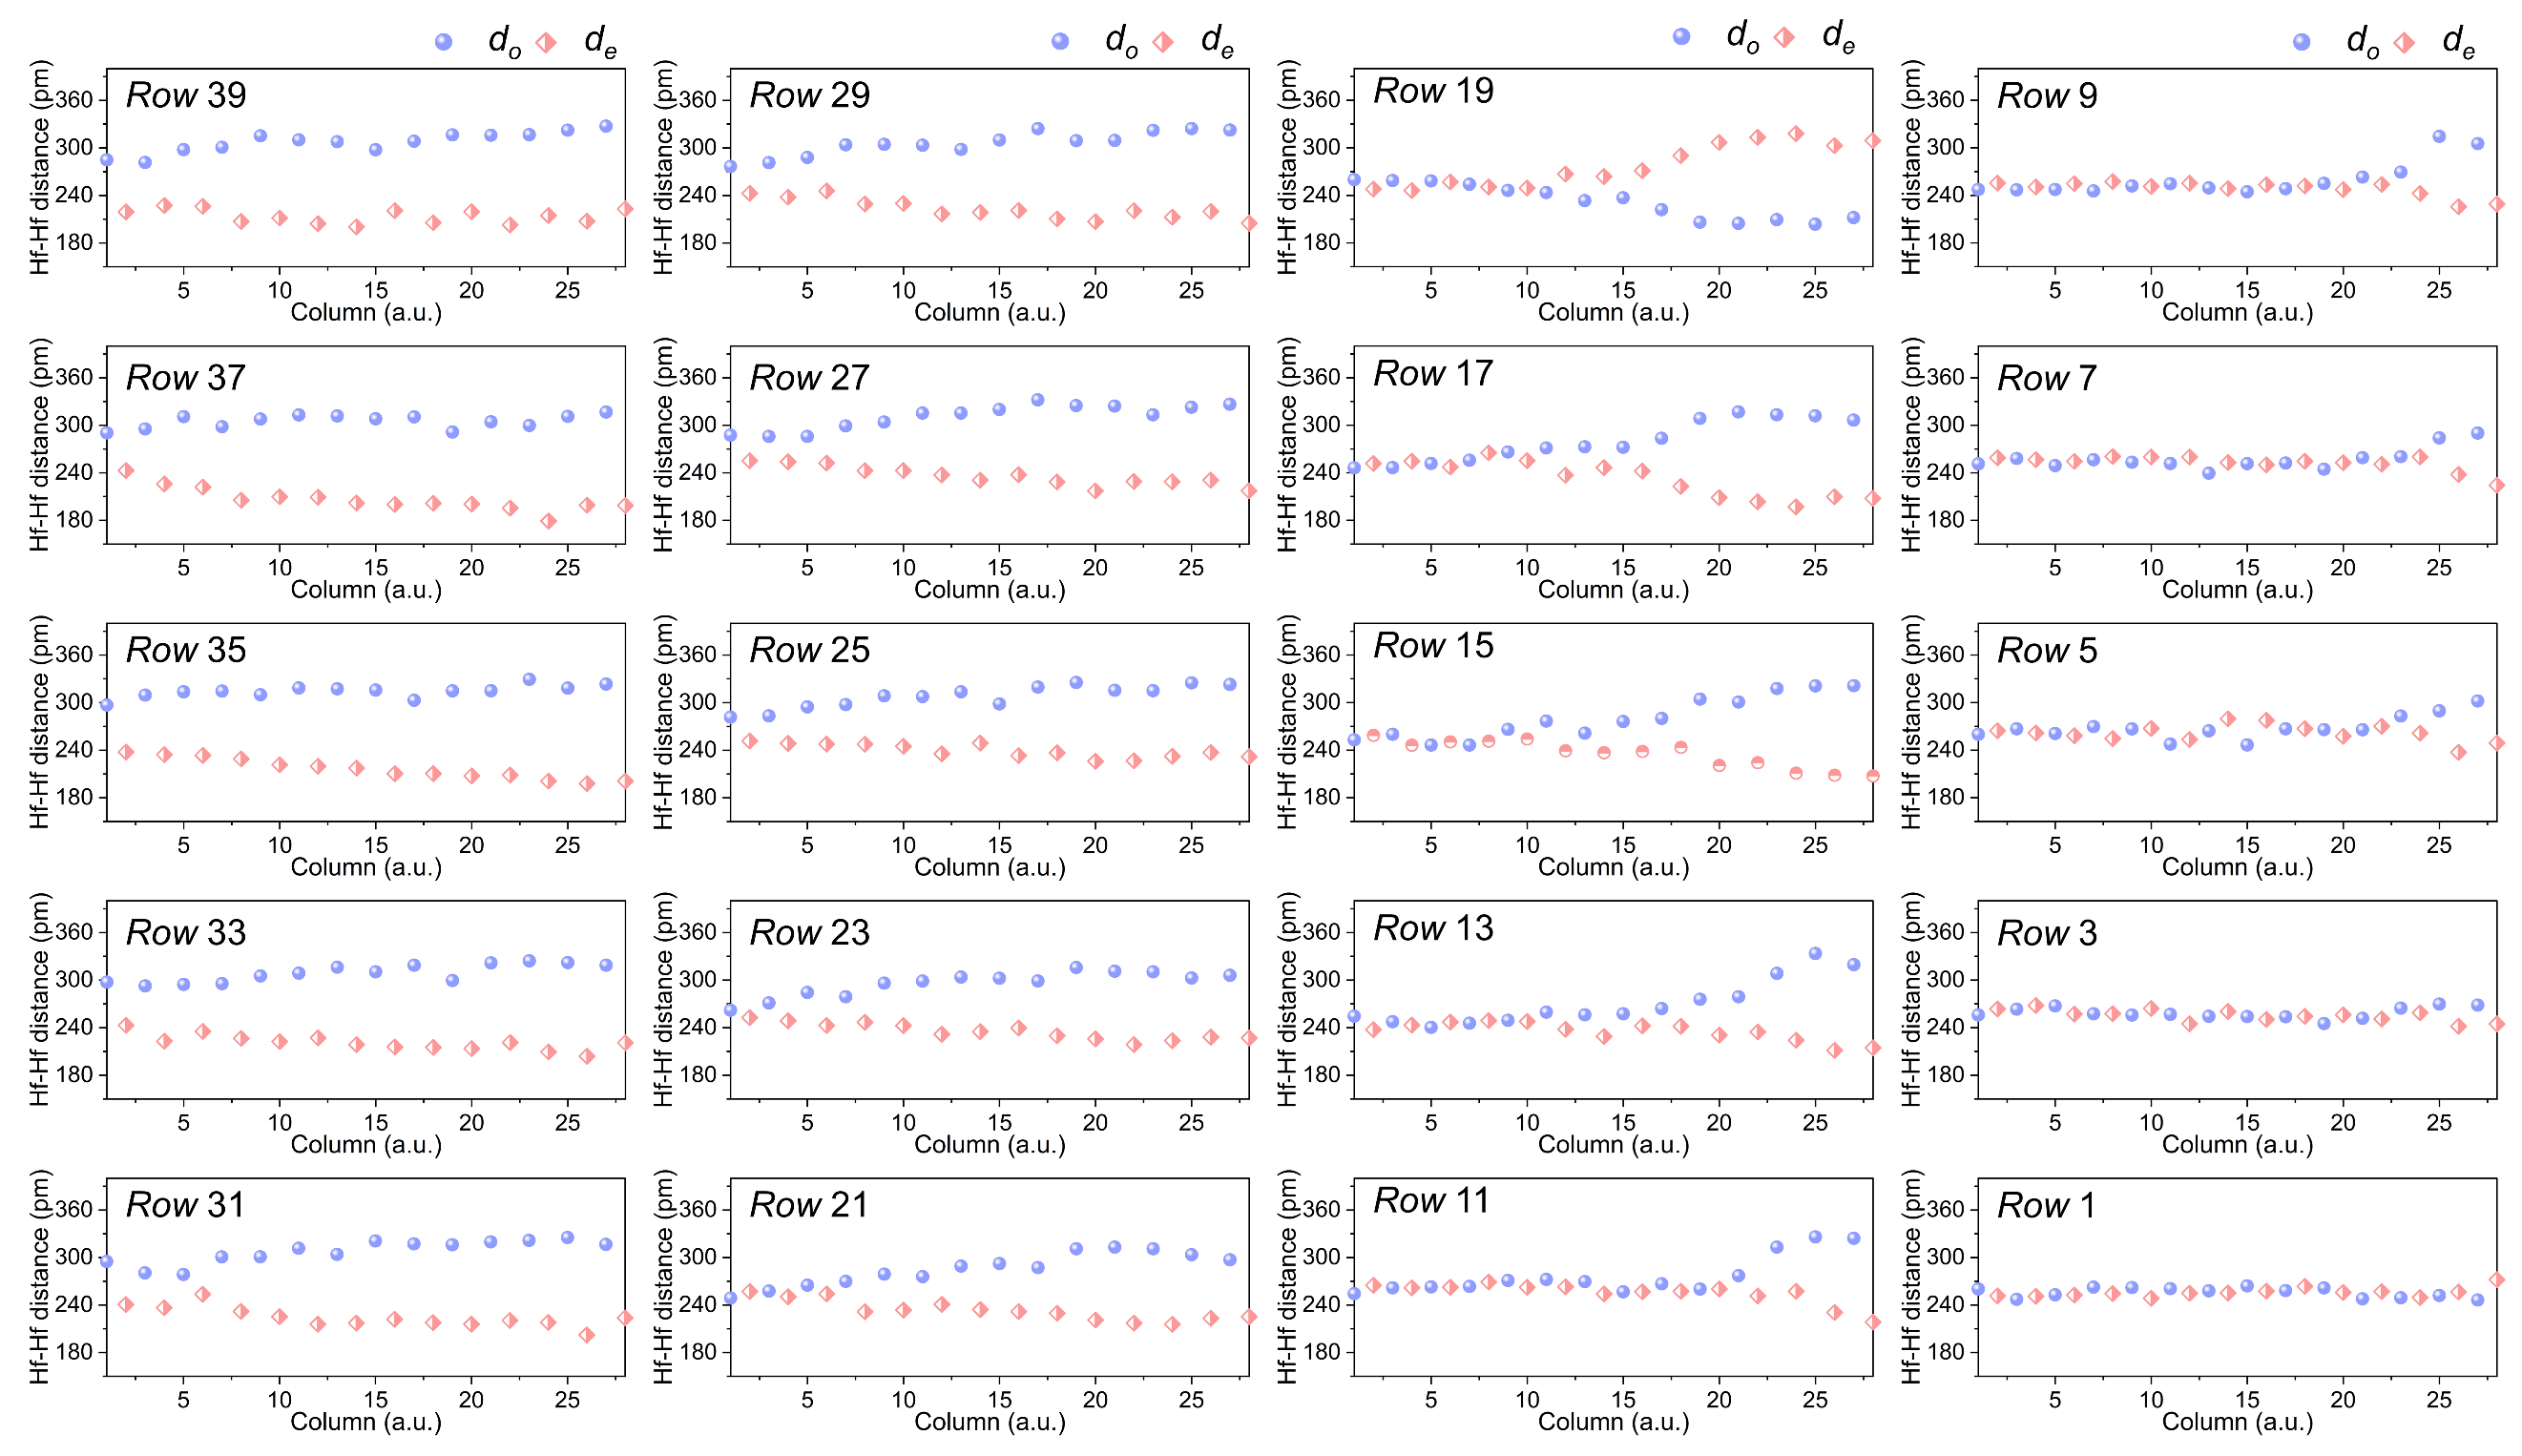


**Supplementary Fig. 14. Vertical Hf-Hf distance evolution process of the different rows shown in Fig. 5a.**


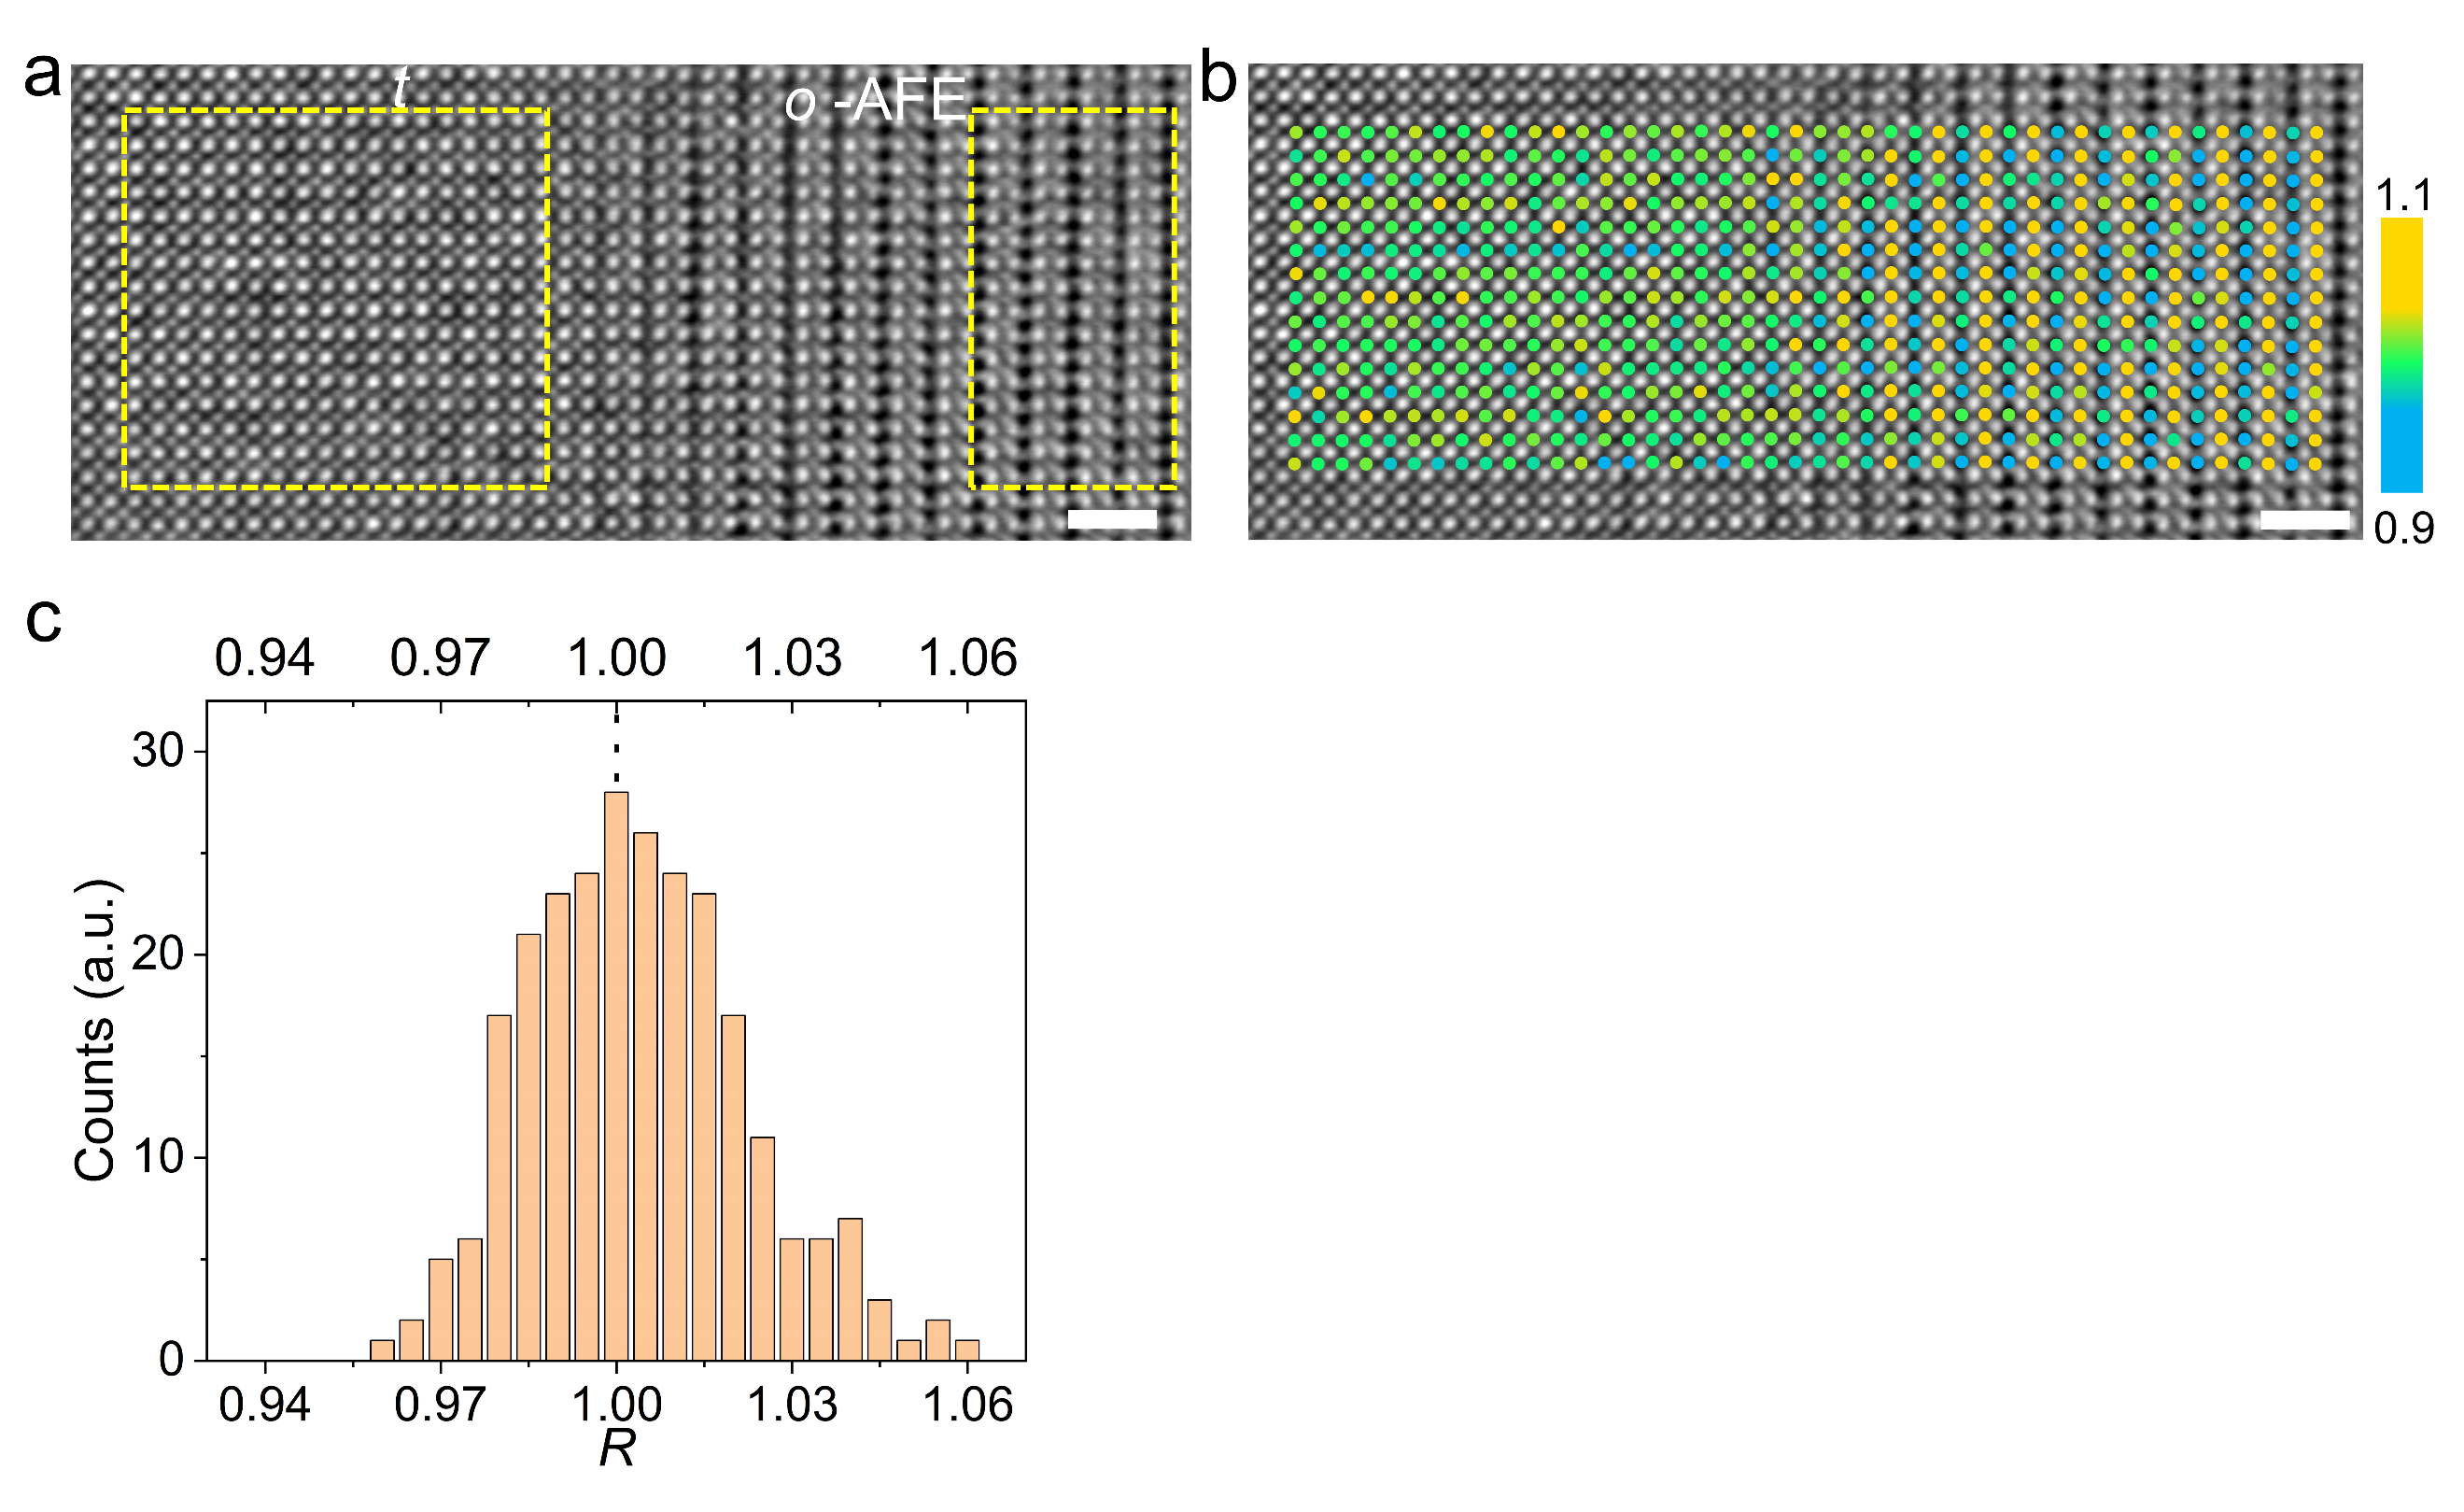


**Supplementary Fig. 15. Coherent interfaces shown in Fig. 6a, with the *b*-axis observation direction of the *o*-AFE phase.** **a**, Raw iDPC-STEM imaging. **b**, iDPC-STEM imaging with the corresponding *R*-value distribution. Scale bar: 1nm. **c**, S**tatistical histogram of the *R*-value for the *t* phase enclosed by the dashed line in Supplementary Fig. 15a.**


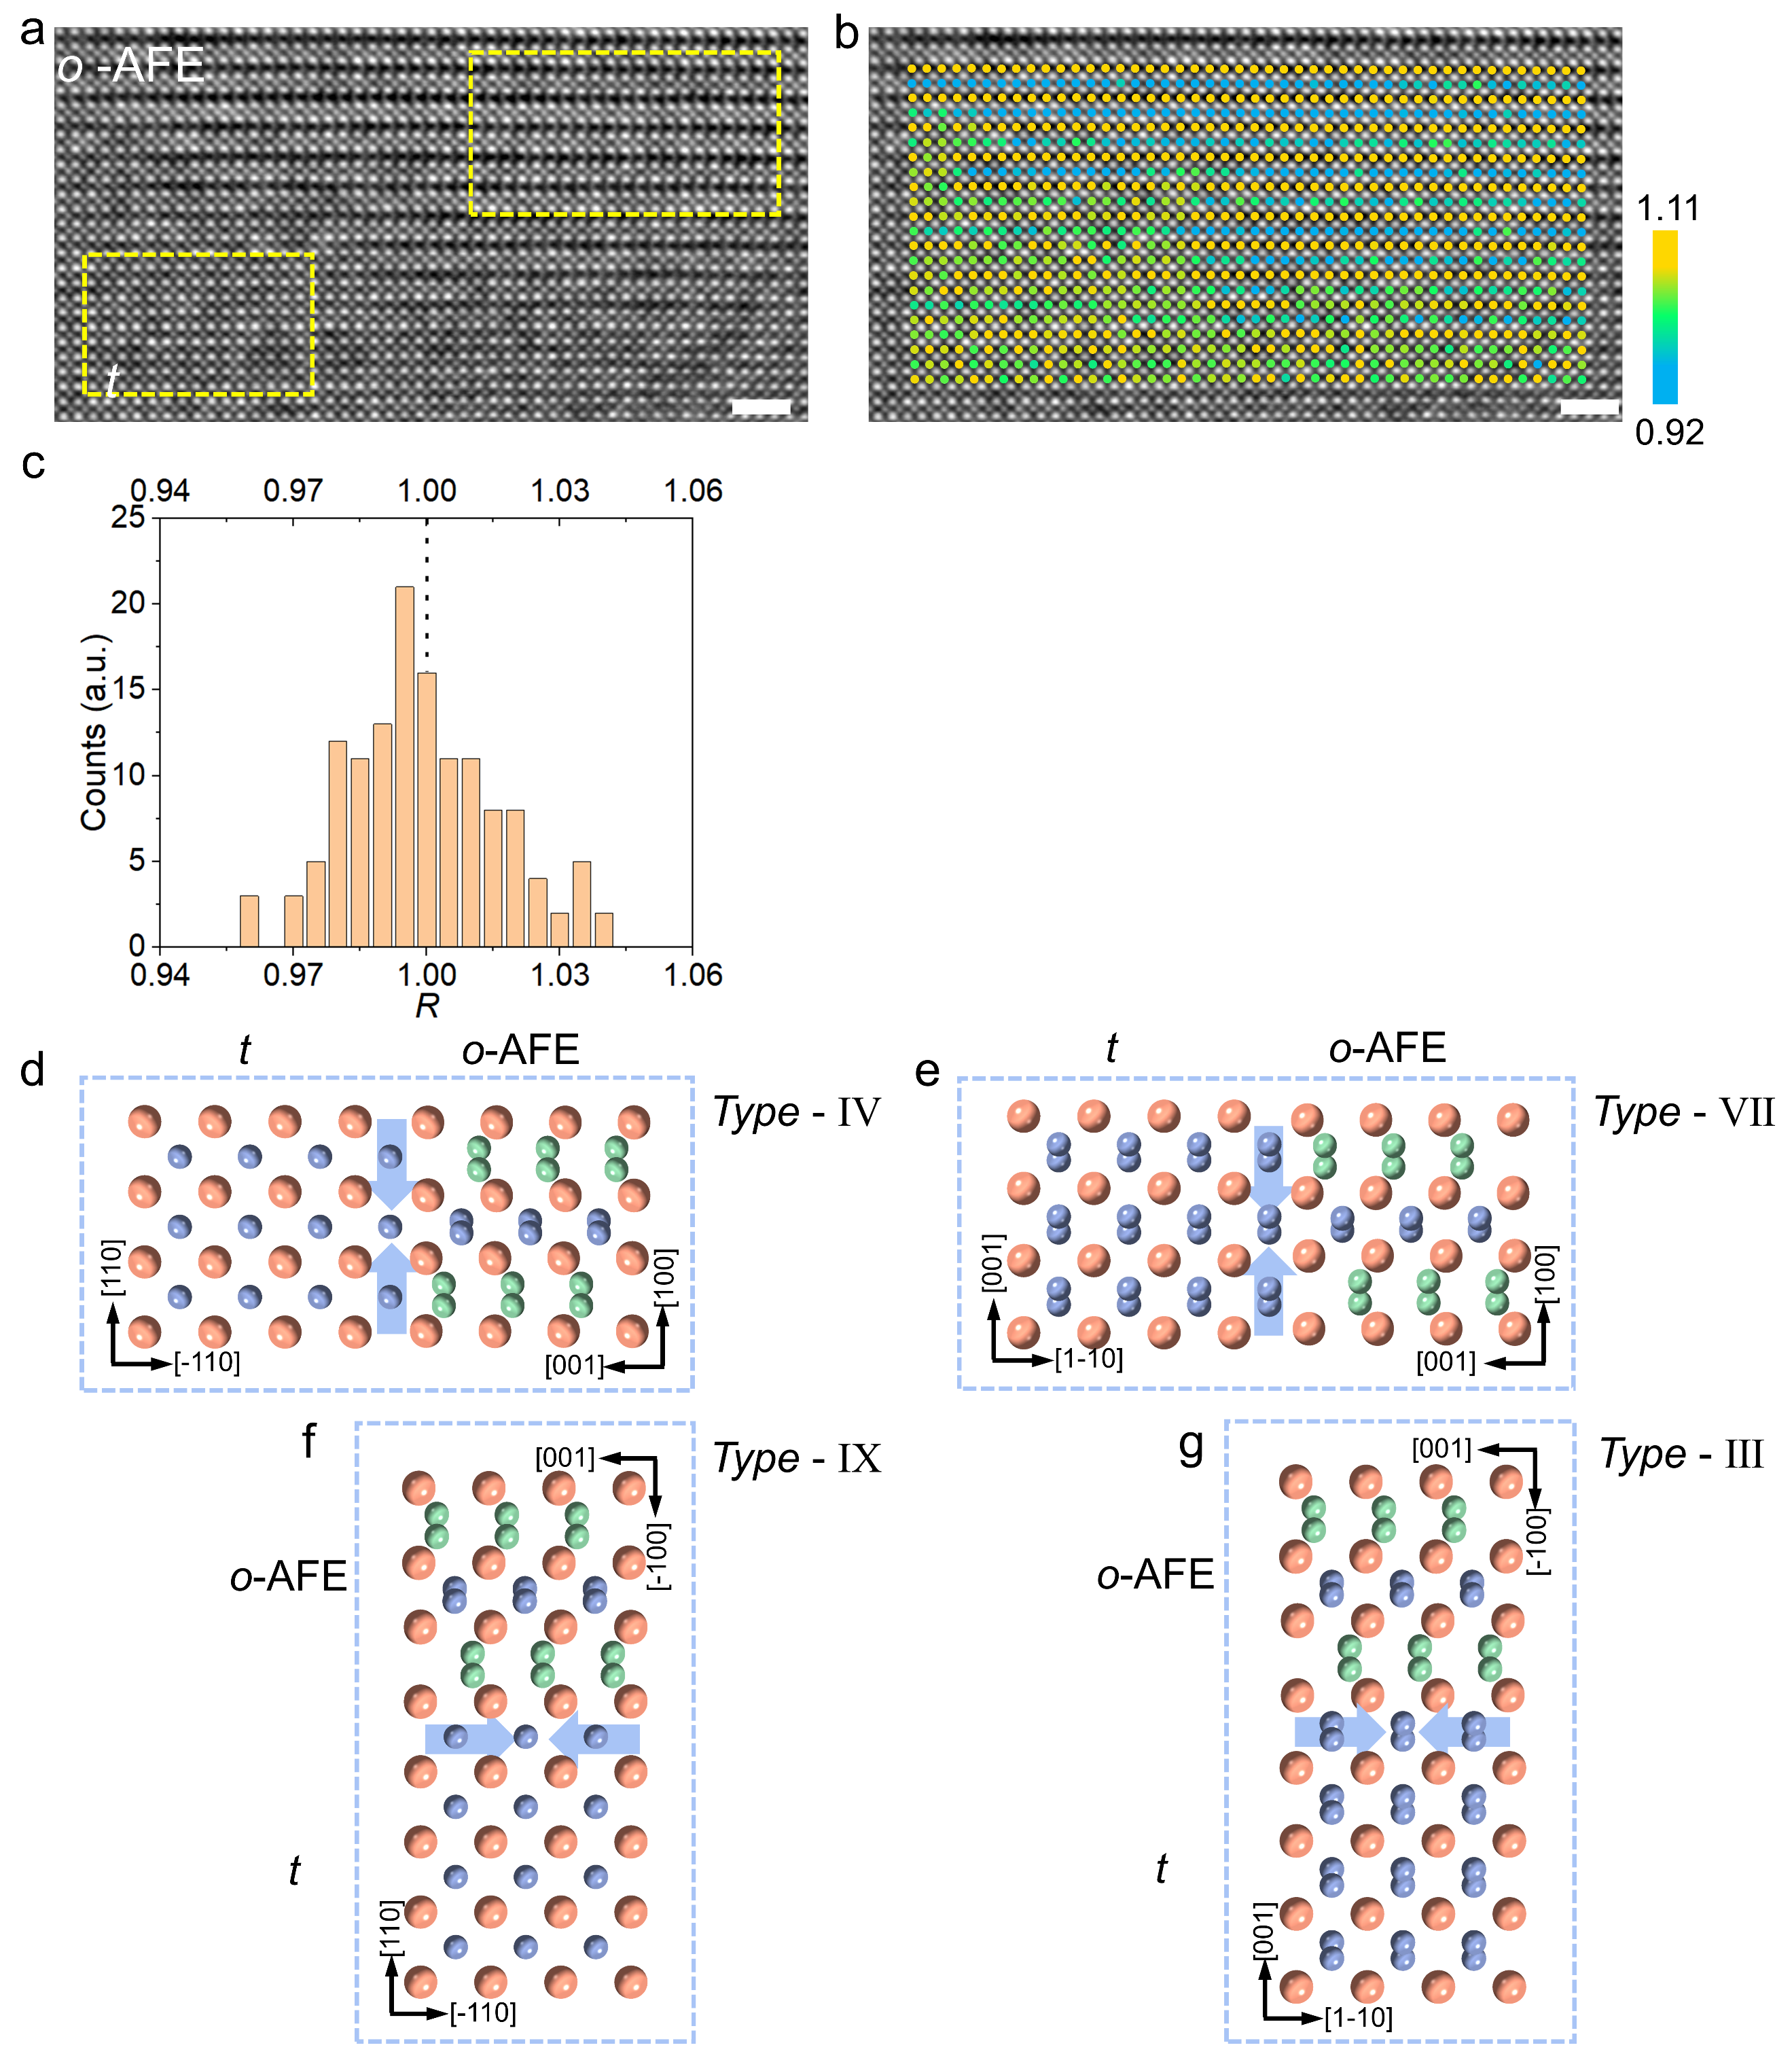


**Supplementary Fig. 16.** **Observed *t*/*o* coherent interfaces within *Crystal* 2, with the *c*-axis observation direction of the *o*-AFE phase.** **a**, Raw iDPC-STEM imaging. **b**, iDPC-STEM imaging with the corresponding *R*-value distribution. Scale bar: 1 nm. **c**, S**tatistical histogram of the *R*-value for the *t* phase enclosed by the dashed line in Supplementary Fig. 11a. d-g**, **Structural schematic diagrams of the strain relationship on the *t* phase induced by the *o*-AFE phase. For (d),** *Case-*(4) (<110>*t* // *ao*-AFE); **For (e),** *Case-*(6) (*ct* // *ao*-AFE)**; For (f),** *Case-*(3) (<110>*t* // *co*-AFE); **For (g),** *Case-*(3) (<110>*t* // *co*-AFE)**.** The strains are calculated based on the average Hf-Hf bond length of the *t* and *o*-AFE phase regions **enclosed by the dashed line in Supplementary Fig. 16a**. The average vertical and horizontal strains in the *t* phase are -1.27% and 0%, respectively.


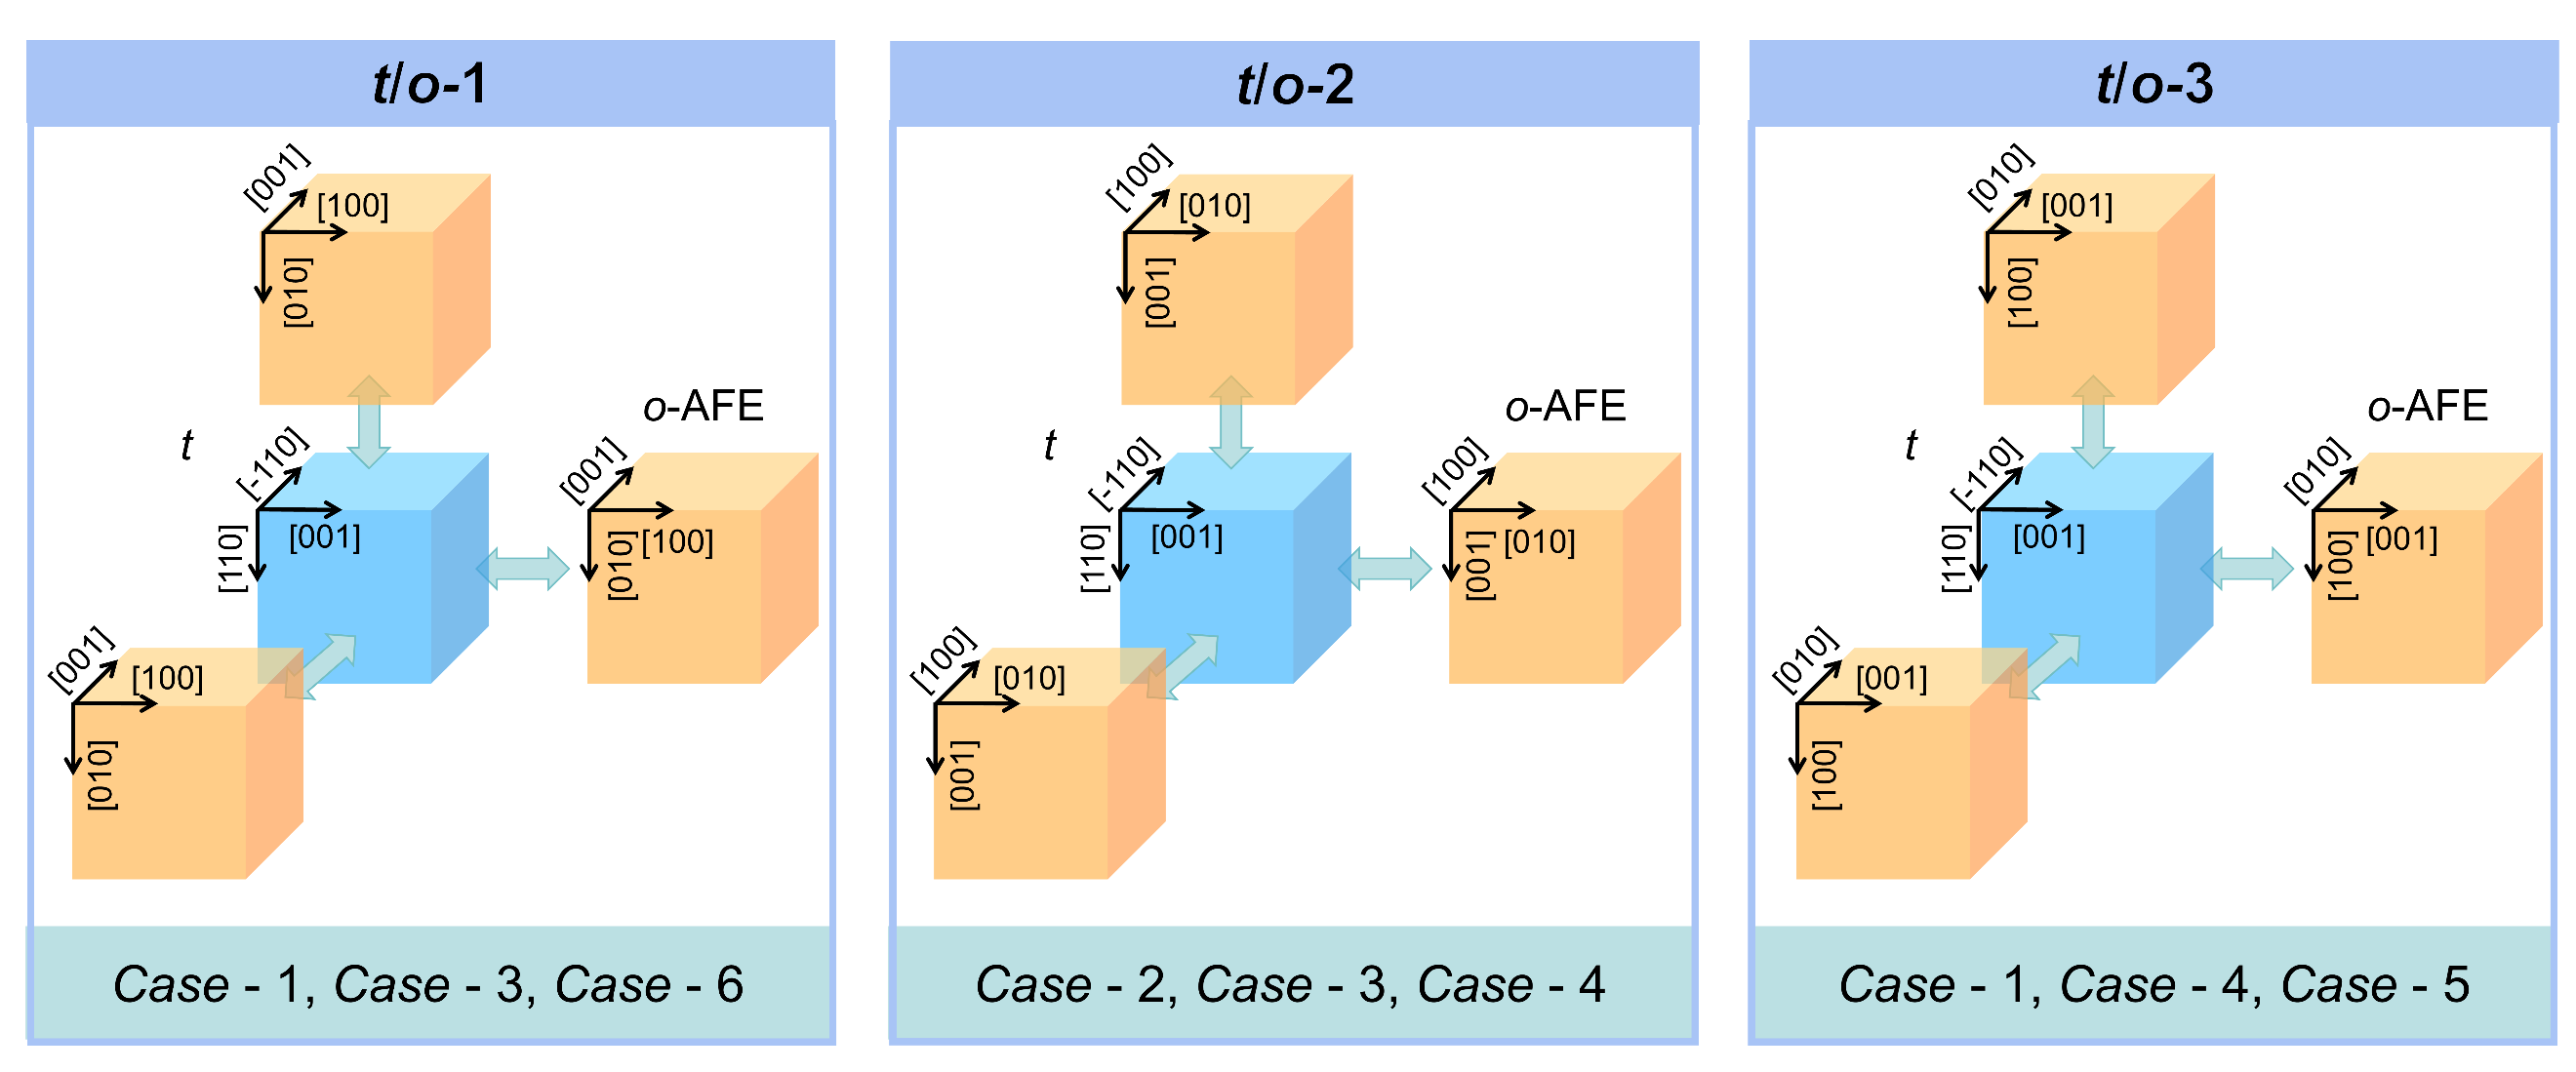


**Supplementary Fig. 17. Schematic diagram of the relative orientation configuration between the *t* and *o*-AFE phases.** The configuration represents the relative spatial orientation relationship between the *t* and the *o*-AFE phase. For the *t*/*o*-1, the [110], [-110], and [001] of the *t* phase correspond to the [010], [001], and [100] of the *o*-AFE phase, respectively. For the *t*/*o*-2, the [110], [-110], and [001] of the *t* phase correspond to the [001], [100], and [010] of the *o*-AFE phase, respectively. For the *t*/*o*-3, the [110], [-110], and [001] of the *t* phase correspond to the [100], [010], and [001] of the *o*-AFE phase, respectively.

**Table S1. Refined lattice parameters of the *t* and *o*-AFE phase within *St* and *So+t* parts within *Crystal* 2*.***

| Phase | *a* (Å) | 20.5**a* (Å) | *b* (Å) | *c* (Å) | *c*/20.5**a* |
| --- | --- | --- | --- | --- | --- |
| *tt* | 3.6015 | 5.0933 | 3.6015 | 5.1431 | 1.0097 |
| *tt+o* | 3.6091 | 5.1040 | 3.6091 | 5.1404 | 1.0071 |
| *ot+o* | 10.1365 | / | 5.2135 | 5.0833 |  |

**Table S2. Reported dielectric constant for the HfO2-based materials.**

| Sample | Dielectric constant | Reference |
| --- | --- | --- |
| Al:HfO2 | 68 | 3 |
| Lu: Hf0.6Zr0.4O2 | 57 | This work |
| Y:H0.5Z0.5O2 | 40.9 | 4 |
| Hf0.5Zr0.5O2 | 46.7 | 5 |
| Hf0.5Zr0.5O2 | 47 | 6 |
| Hf0.5Zr0.5O2 | 50 | 7 |
| Hf0.5Zr0.5O2 | 52.3 | 8 |
| Hf0.5Zr0.5O2 | 64.47 | 9 |
| HZO | 66 | 10 |
| Hf0.5Zr0.5O2 | 68 | 11 |
| La:Hf0.5Zr0.5O2 | 68.5 | 12 |
| HZO(Hf:Zr=1:2) | 49 | 13 |
| HZO(Hf:Zr=1:2) | 51.9 | 14 |
| Hf0.3Zr0.7O2 | 38 | 15 |
| Hf0.3Zr0.7O2 | 47 | 16 |
| Hf0.25Zr0.75O2 | 44.37 | 17 |
| HZZ | ~38 | 18 |
| HZZ | 46 | 19 |
| ZrO2/HZO | 59 | 20 |
| Hf0.5Zr0.5O2/ZrO2 | ~60 | 21 |
| HZZ | 62 | 22 |

**Table S3. Summarized results of the calculated average strain in the *t* phase derived from different *t*/*o* coherent interfaces within the bulk Lu:HZO crystal.**

|  | Strain*t* | *Configuration* | *Case* |
| --- | --- | --- | --- |
| Tensile  strain | 2.53% [Fig. 5b] | *t*/*o-*1, *t*/*o-*3 | *Case*-(1) |
| 1.56%  [Supplementary Fig. 11] | *t*/*o-*2 | *Case*-(2) |
| 2.34%  [Supplementary Fig. 12] | *t*/*o-*1, *t*/*o-*3 | *Case*-(1) |
| Compressive strain | -0.83% [Fig. 5b] | *t*/*o-*1, *t*/*o-*3 | *Case*-(4), *Case*-(6) |
| -0.17% [Fig. 6a] | *t*/*o*-2 | *Case*-(3) |
| ~0 [Fig. 6c] | *t*/*o-*1, *t*/*o-*2 | *Case*-(3) |
| -1.27% [Fig. 6c] | *t*/*o-*1, *t*/*o-*2 | *Case*-(4), *Case*-(6) |
| -0.42%  [Supplementary Fig. 11] | *t*/*o-*2 | *Case*-(4) |
| -0.72%  [Supplementary Fig. 12] | *t*/*o-*1, *t*/*o-*3 | *Case*-(4), *Case*-(6) |

**Reference**

1. Wang, S. *et al.* Unlocking the phase evolution of the hidden non-polar to ferroelectric transition in HfO2-based bulk crystals. *Nature Commun.* **16**, 3745 (2025).
2. Fan, S. *et al.* Vibrational fingerprints of ferroelectric HfO2. *npj Quantum Mater.* **7**, 32 (2022).
3. Zhou, J.; Zhou, Z.; Jiao, L.; Wang, X.; Kang, Y.; Wang, H.; Han, K.; Zheng, Z.; Gong, X., Al-doped and deposition temperature-engineered HfO2 near morphotropic phase boundary with record dielectric permittivity (~68). *2021 IEEE International Electron Devices Meeting (IEDM)*, 2021; pp 13.4.1-13.4.4.
4. Kim, J. Y. *et al.* Stabilization of tetragonal phase in hafnium zirconium oxide by cation doping for high-*κ* dielectric insulators. *ACS Appl. Mater. Interfaces* **16**, 60811–60818 (2024).
5. Luo, Z. *et al.* 5.1 Å EOT and low leakage TiN/Al2O3/Hf0.5Zr0.5O2/Al2O3/TiN heterostructure for DRAM capacitor. *Appl. Phys. Lett.* **122**, 192903 (2023).
6. Park, M. H. et al. Morphotropic phase boundary of Hf1-*x*Zr*x*O2 thin films for dynamic random access memories. *ACS Appl. Mater. Interfaces* 10, 42666–42673 (2018).
7. Zhao, Z. *et al.* Engineering Hf0.5Zr0.5O2 ferroelectric/anti-ferroelectric phases with oxygen vacancy and interface energy achieving high remanent polarization and dielectric constants. *IEEE Electron Device Lett.* **43**, 553–556 (2022).
8. Wang, Y. *et al.* Simultaneously achieving high-*κ* and strong ferroelectricity in Hf0.5Zr0.5O2 thin film by structural stacking design. *J. Materiomics* **11**, 101016 (2025).
9. Yang, K., Shin, H., Kim, S., Jung, T. & Jeon, S. Very high frequency (∼100 MHz) plasma enhanced atomic layer deposition high-*κ* hafnium zirconium oxide capacitors near morphotropic phase boundary with low current density & high-*κ* for DRAM technology. *J. Mater. Chem. C* **13**, 6702–6707 (2025).
10. Gaddam, V.; Hwang, J.; Shin, H.; Kim, C.; Kim, G.; Kim, H.-J.; Lee, J.; Kim, H.-C.; Park, B.; Lim, S.; Kim, S. Y.; Kim, K.; Lee, S.; Ha, D.; Ahn, J.; Jeon, S., Low-damage processed and high-pressure annealed high-*κ* hafnium zirconium oxide capacitors near morphotropic phase boundary with record-low EOT of 2.4Å & high-*κ* of 70 for DRAM technology. *2024 IEEE Symposium on VLSI Technology and Circuits (VLSI Technology and Circuits)*, 2024; pp 1-2.
11. Kim, S.-M. *et al.* Laser-induced phase control of morphotropic phase boundary hafnium-zirconium oxide. *ACS Appl. Mater. Interfaces* **17**, 3531-3537 (2025).
12. Lee, M. *et al.* Effect of La and Si additives in Zr-doped HfO2 capacitors for pseudo-linear high-*κ* dielectric applications. *Nano Converg.* **12**, 15 (2025).
13. Das, D., Buyantogtokh, B., Gaddam, V. & Jeon, S. Sub 5 Å-EOT Hf*x*Zr1-*x*O₂ for next-generation DRAM capacitors using morphotropic phase boundary and high-pressure (200 atm) annealing with rapid cooling process. *IEEE T. Electron Dev.* **69**, 103–108 (2022).
14. Das, D. & Jeon, S. High-*κ* Hf*x*Zr1-*x*O₂ ferroelectric insulator by utilizing high pressure anneal. *IEEE T. Electron Dev.* **67**, 2489–2494 (2020).
15. Ni, K. *et al.* Equivalent oxide thickness (EOT) scaling with hafnium zirconium oxide high-*κ* dielectric near morphotropic phase boundary. *2019 IEEE International Electron Devices Meeting (IEDM)*, San Francisco, CA, USA, 2019, pp. 7.4.1-7.4.4.
16. Oh, S., Jang, H. & Hwang, H. Composition optimization of Hf*x*Zr1-*x*O2 thin films to achieve the morphotrophic phase boundary for high-*κ* dielectrics. *J. Appl. Phys.* **133**, 154102 (2023).
17. Kim, S. *et al.* Method to achieve the morphotropic phase boundary in Hf*x*Zr1-*x*O2 by electric field cycling for DRAM cell capacitor applications. *IEEE Electron Device Lett.* **42**, 517–520 (2021).
18. Ghiasabadi Farahani, M. *et al.* Dual ferroelectric polarization and dielectric response improvement in epitaxial Hf0.5Zr0.5O2/HfO2 nanolaminates. *ACS Appl. Mater. Interfaces* **17**, 3570–3577 (2025).
19. Lou, Z. F. *et al.* Super-lamination HZO/ZrO₂/HZO of ferroelectric memcapacitors with morphotropic phase boundary (MPB) for high capacitive ratio and non-destructive readout. *IEEE Electron Device Lett.* **45**, 2355–2358 (2024).
20. Gaddam, V. *et al.* Novel approach to high *κ* (∼59) and low EOT (∼3.8 Å) near the morphotrophic phase boundary with AFE/FE (ZrO2/HZO) bilayer heterostructures and high-pressure annealing. *ACS Appl. Mater. Interfaces* **14**, 43463–43473 (2022).
21. Kashir, A., Ghiasabadi Farahani, M. & Hwang, H. Towards an ideal high-*κ* HfO2-ZrO2-based dielectric. *Nanoscale* **13**, 13631–13640 (2021).
22. Oh, S., Jang, H. & Hwang, H. Accurate evaluation of high-*κ* HZO/ZrO2 films by morphotropic phase boundary. *IEEE Electron Device Lett.* **45**, 28–31.(2024).
